# Supplementary material for: De Novo Design of Imidazopyridine-Tethered Pyrazolines That Target Phosphorylation of STAT3 in Human Breast Cancer Cells
Source: MDPI journal article supplement (doi:10.3390/bioengineering10020159), 2023-01-24
Supplement: s1 [file s1]

***De novo* drug design of imidazopyridine tethered pyrazoles that Targets  
Phosphorylation of STAT3 in Human Breast Cancer Cells**

**Akshay Ravish<sup>1,#</sup>, Rashmi Shivakumar<sup>1,#</sup>, Zhang Xi<sup>2,#</sup>, Min Hee Yang<sup>3</sup>, Ji-Rui Yang<sup>4</sup>,  
Ananda Swamynayaka<sup>5</sup>, Omantheswara Nagaraja<sup>5</sup>, Mahendra Madegowda<sup>5</sup>,  
Arunachalam Chinnathambi<sup>6</sup>, Sulaiman Ali Alharbi<sup>6</sup>, Vijay Pandey<sup>4,7</sup>, Gautam  
Sethi<sup>8,\*</sup>, Kwang Seok Ahn<sup>2,9,\*</sup>, Peter E. Lobie<sup>3,4,7,\*</sup>, Basappa Basappa<sup>1\*</sup>**

**Supplementary data for newly synthesized molecules and their IC50 values  
determined against human breast cancer cells**

## NMR DATA

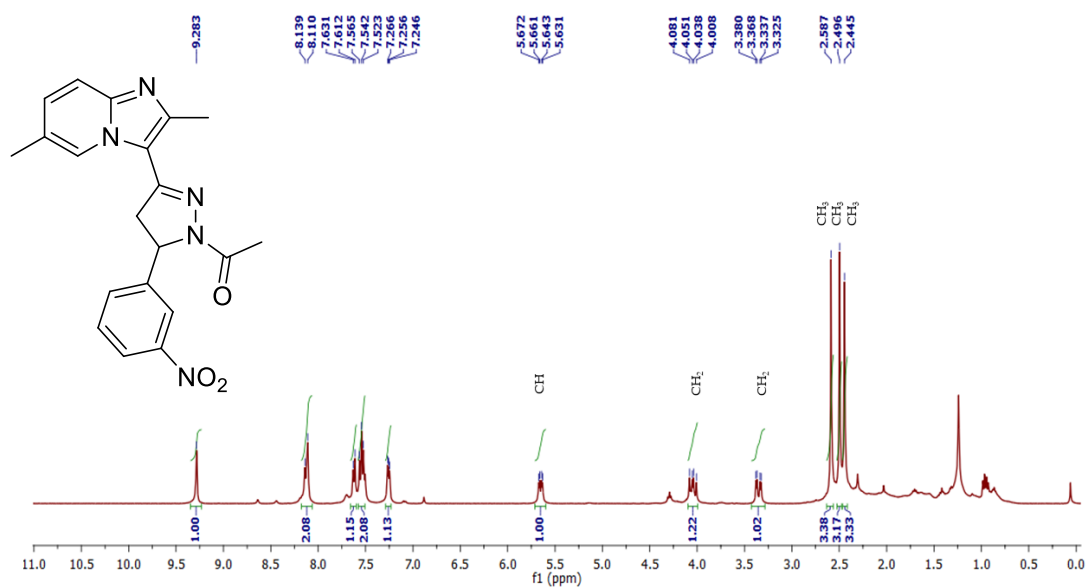

<sup>1</sup>H NMR of 2

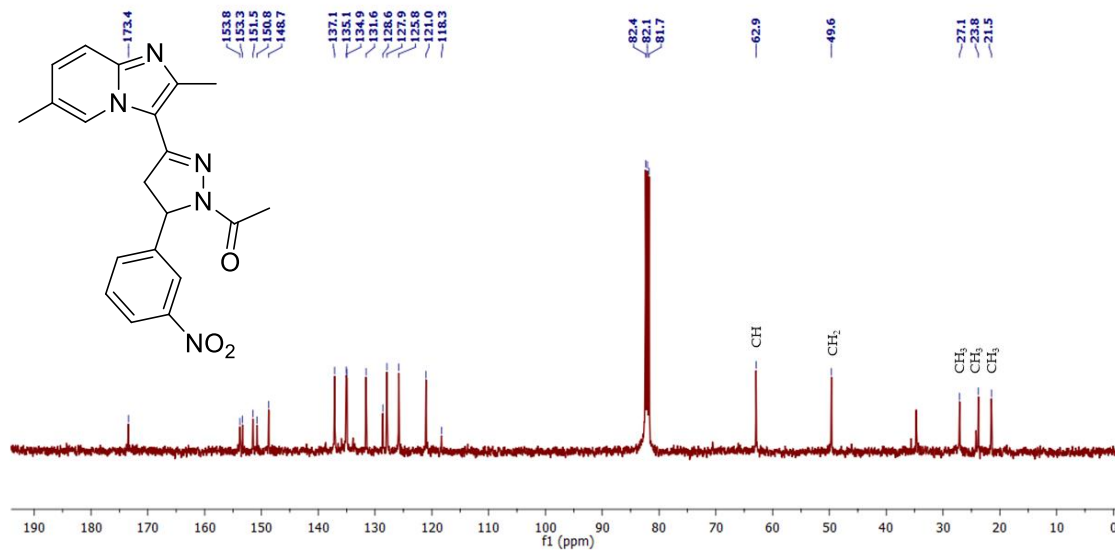

<sup>13</sup>C NMR of 2

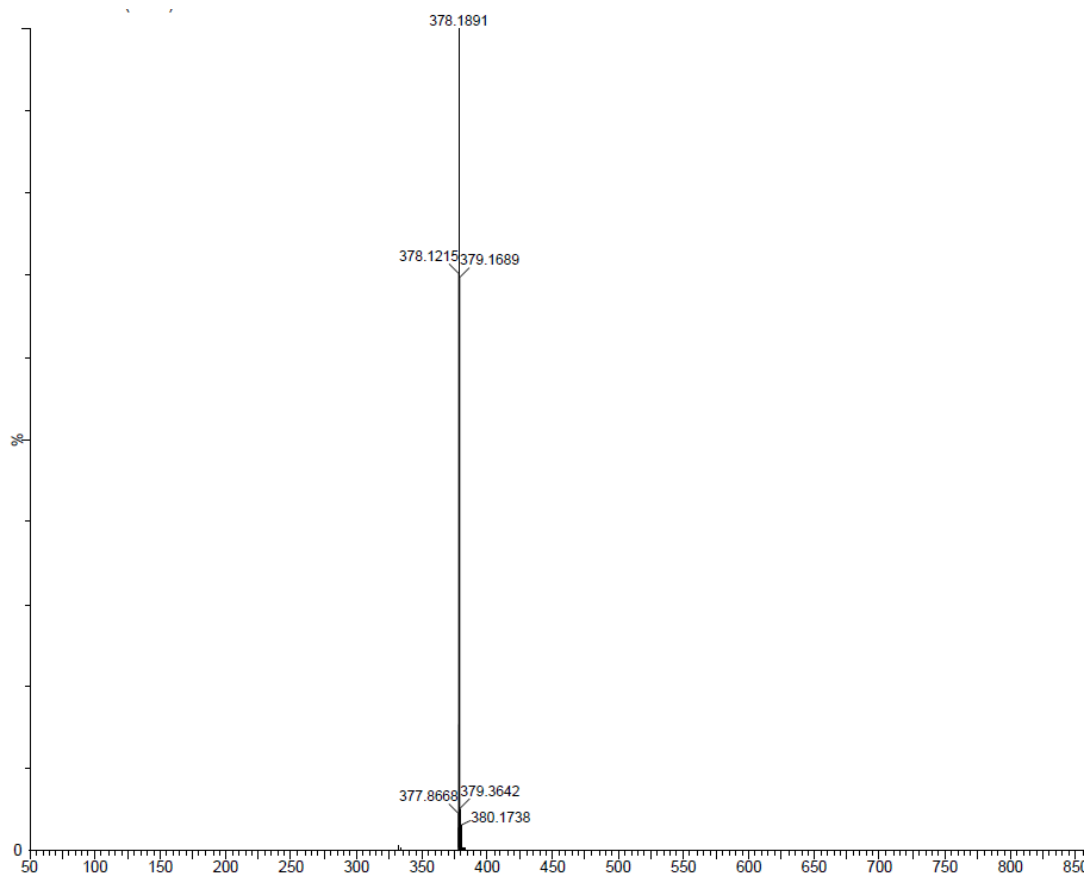

Mass spectra of 2

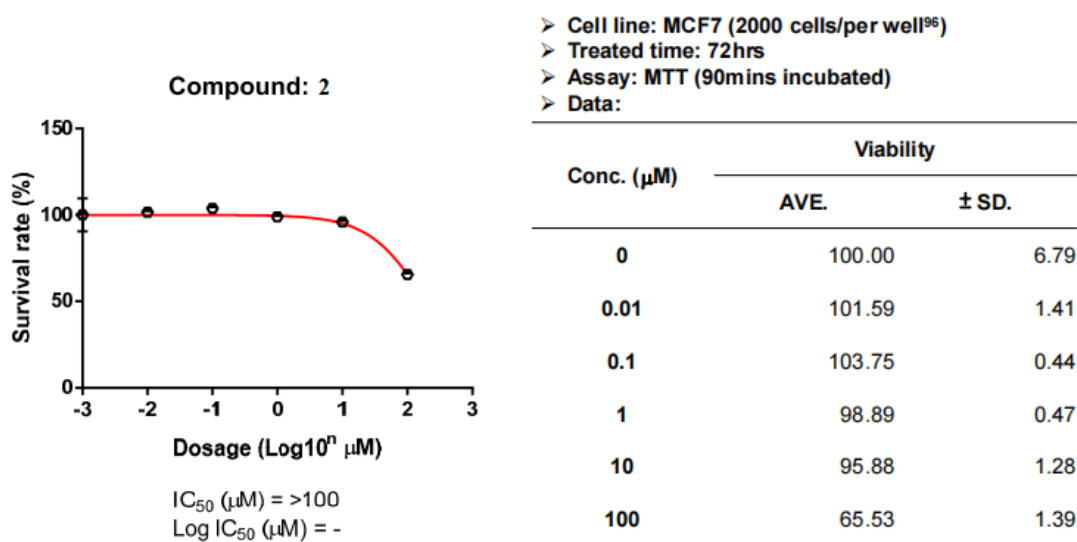

MCF-7 Log curve of 2

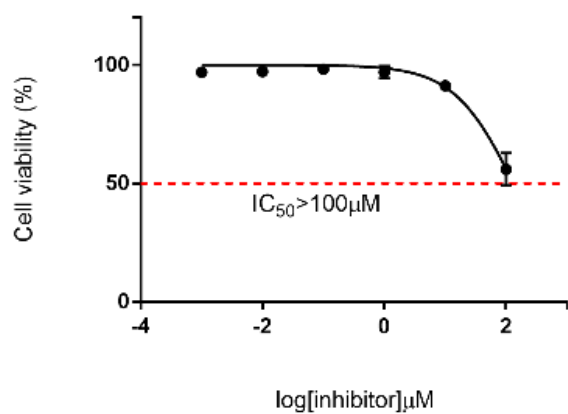

T47D Log curve of 2

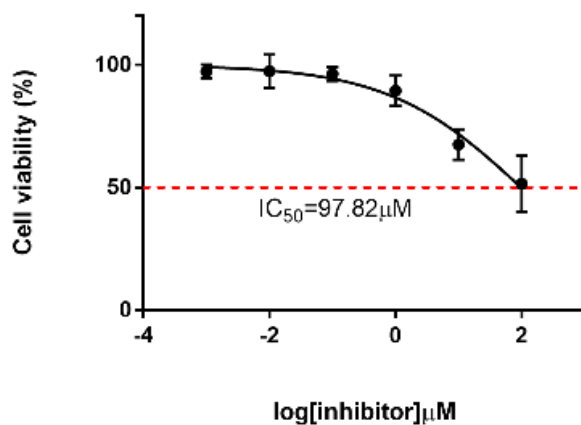

BT474 Log curve of 2

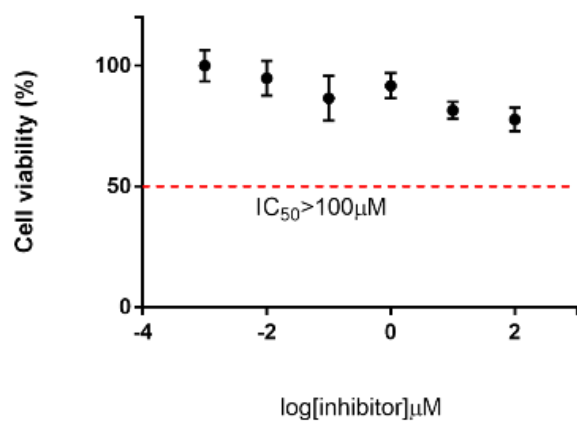

SK-BR-3 log curve of 2

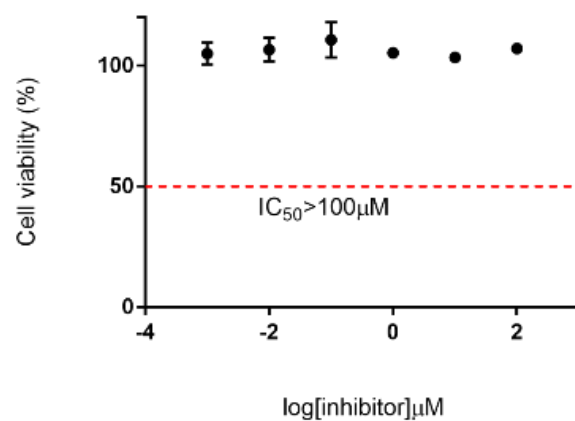

MCF-10A log curve of 2

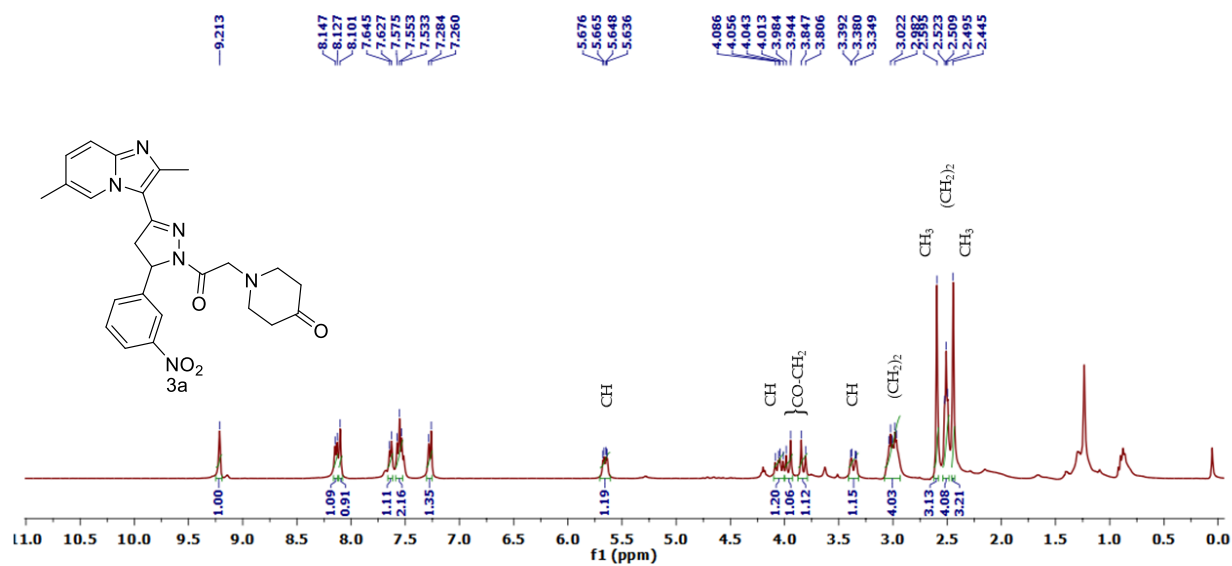

$^1\text{H}$  NMR of 3a

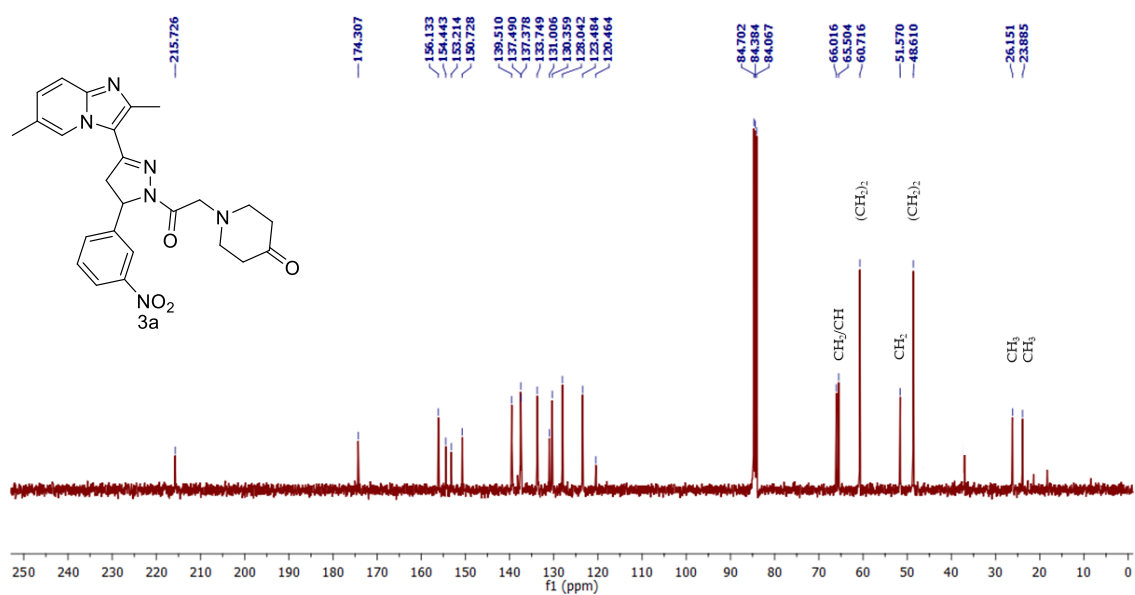

$^{13}\text{H}$  NMR of **3a**

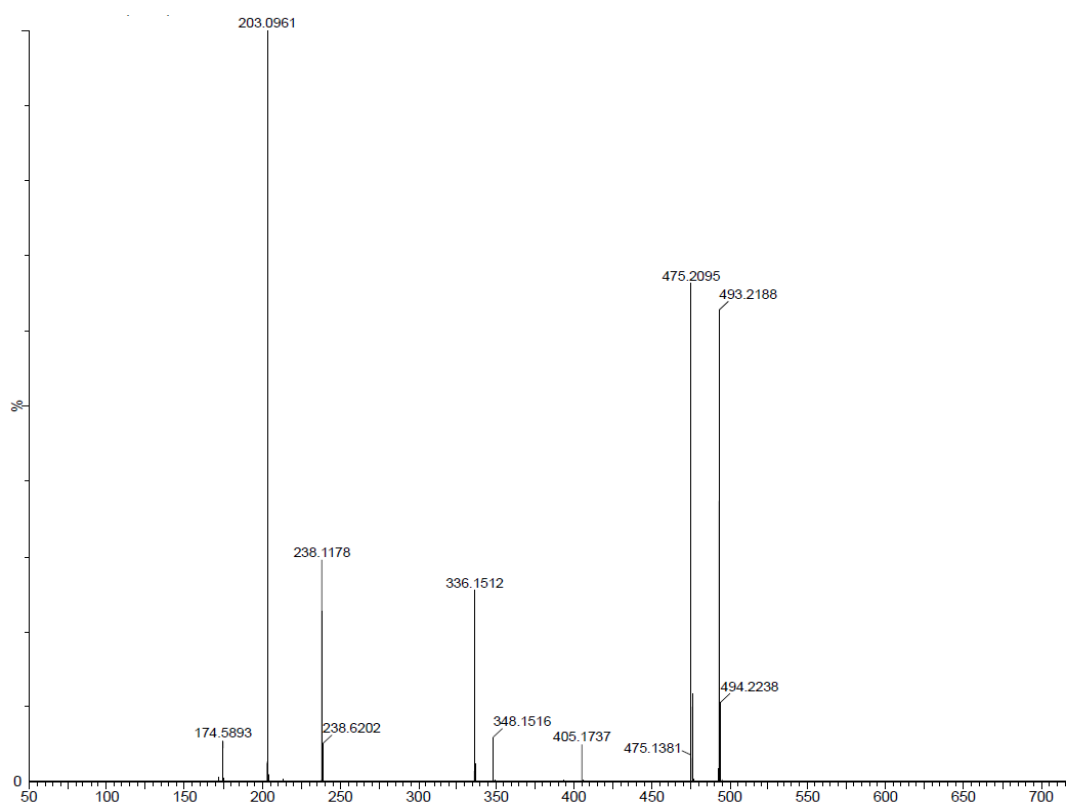

Mass spectra of **3a**

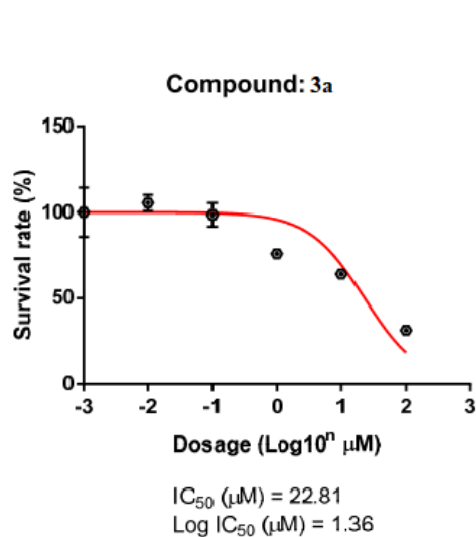

- Cell line: MCF7 (2000 cells/per well<sup>96</sup>)
- Treated time: 72hrs
- Assay: MTT (90mins incubated)
- Data: 3a

| Conc. ( $\mu\text{M}$ ) | Viability |           |
|-------------------------|-----------|-----------|
|                         | AVE.      | $\pm$ SD. |
| 0                       | 100.00    | 10.10     |
| 0.01                    | 105.50    | 4.69      |
| 0.1                     | 98.61     | 6.78      |
| 1                       | 75.99     | 1.24      |
| 10                      | 64.01     | 0.42      |
| 100                     | 31.59     | 0.04      |

MCF-7 Log curve of 3a

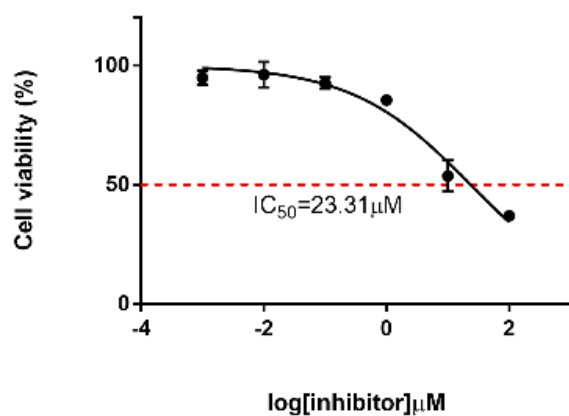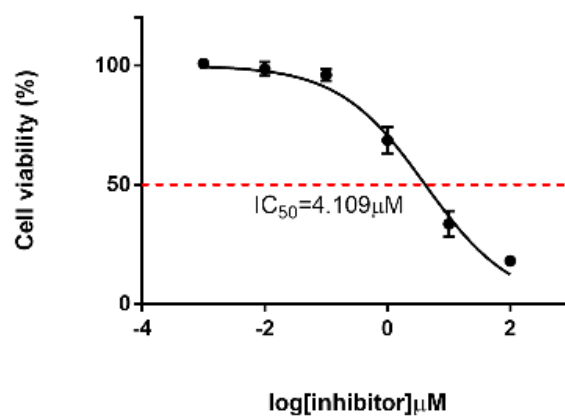

T47D Log curve of 3a

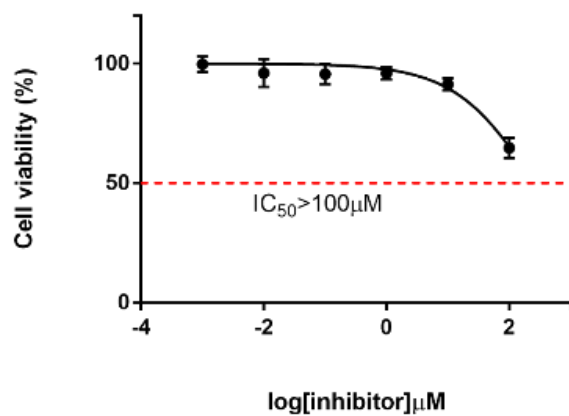

BT474 Log curve of 3a

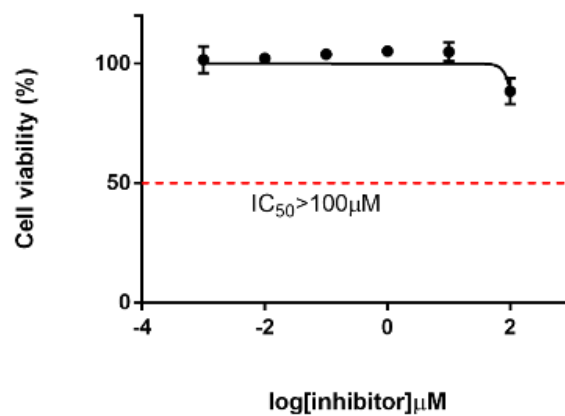

SK-BR-3 log curve of 3a

MCF-10A log curve of 3a

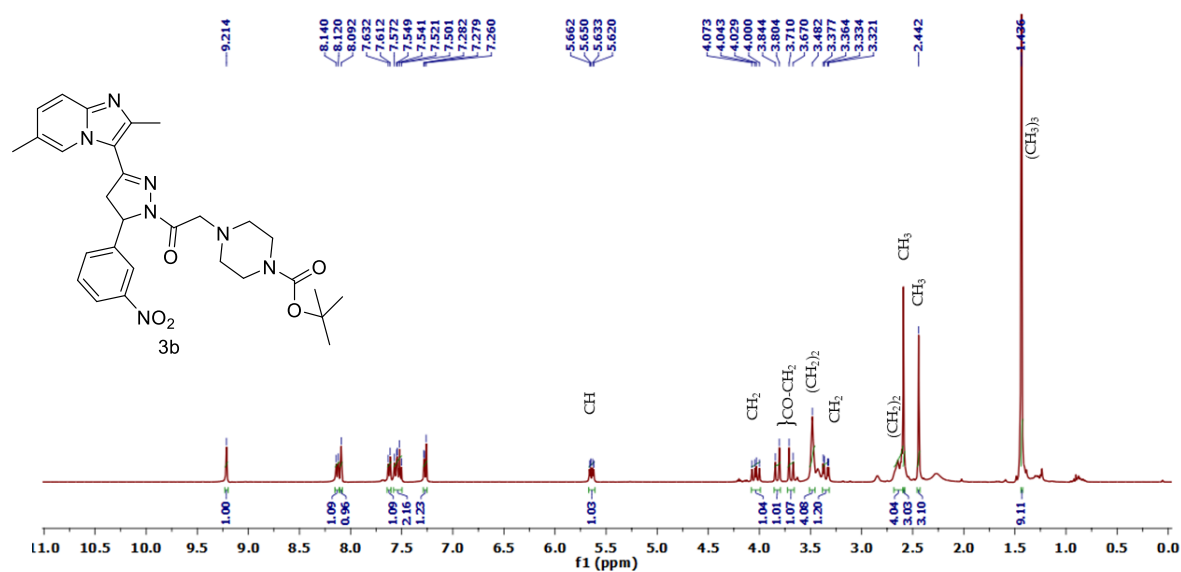

<sup>1</sup>H NMR of **3b**

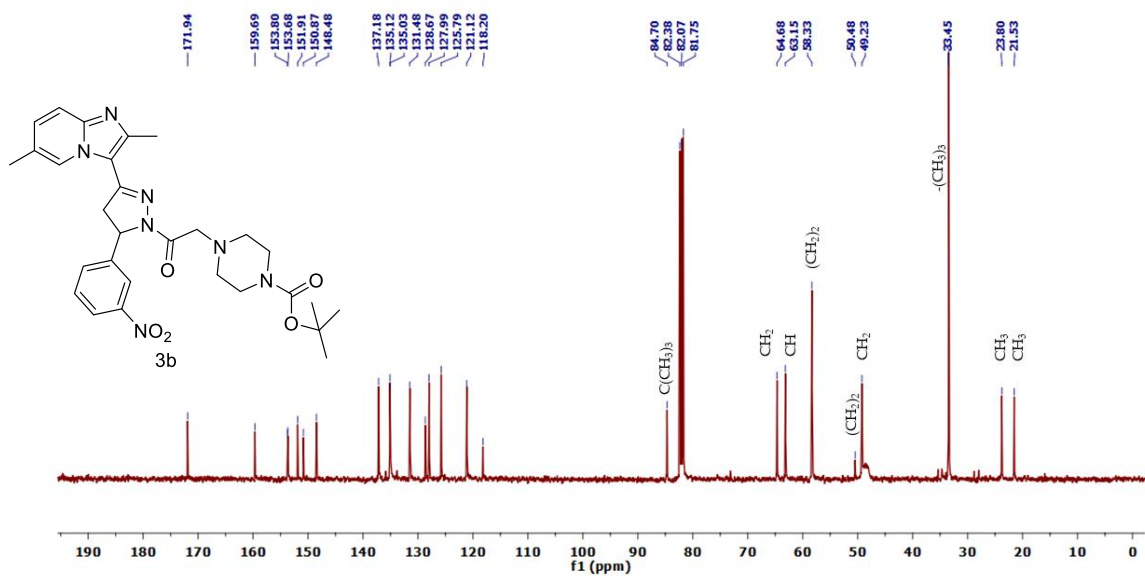

<sup>13</sup>C NMR of **3b**

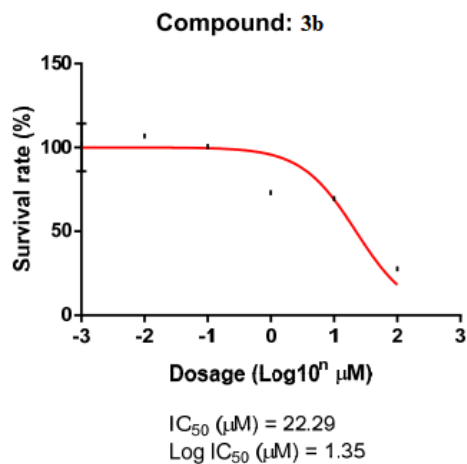

- Cell line: MCF7 (2000 cells/per well<sup>96</sup>)
- Treated time: 72hrs
- Assay: MTT (90mins incubated)
- Data: 3b

| Conc. ( $\mu\text{M}$ ) | Viability |           |
|-------------------------|-----------|-----------|
|                         | AVE.      | $\pm$ SD. |
| 0                       | 100.00    | 10.10     |
| 0.01                    | 105.31    | 0.45      |
| 0.1                     | 99.02     | 0.39      |
| 1                       | 71.53     | 1.51      |
| 10                      | 68.11     | 2.70      |
| 100                     | 26.22     | 0.70      |

MCF-7 Log curve of 3b

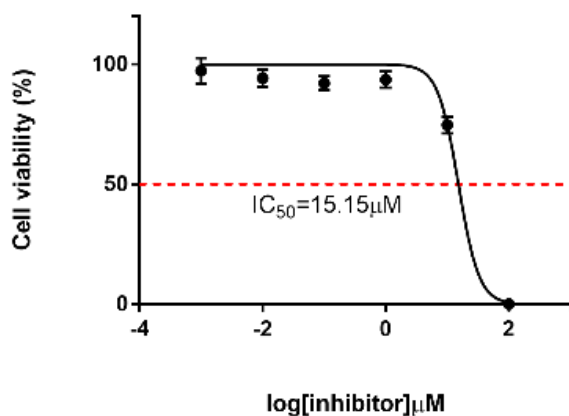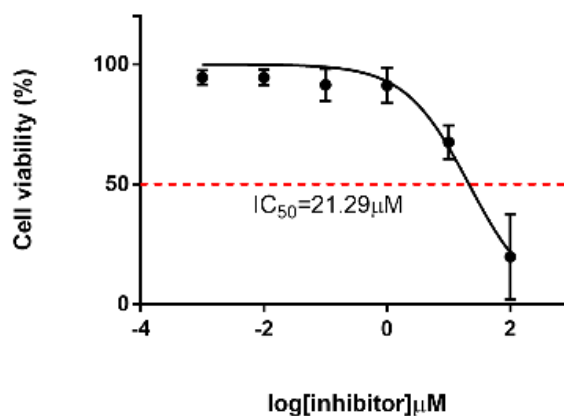

T47D Log curve of 3b

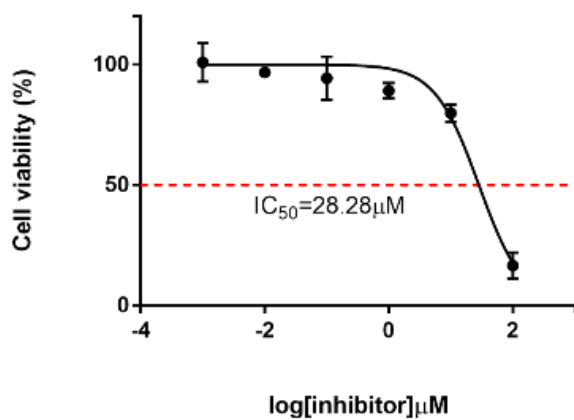

BT474 Log curve of 3b

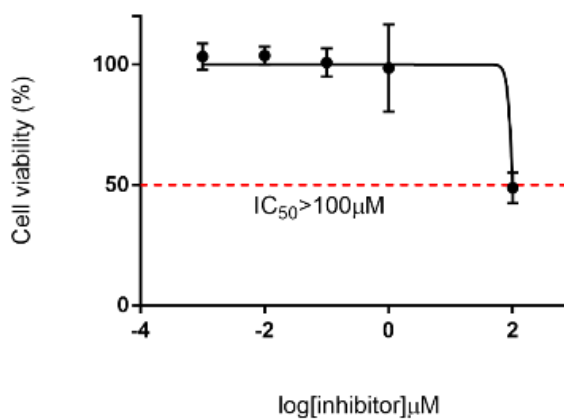

SK-BR-3 log curve of 3b

MCF-10A log curve of 3b





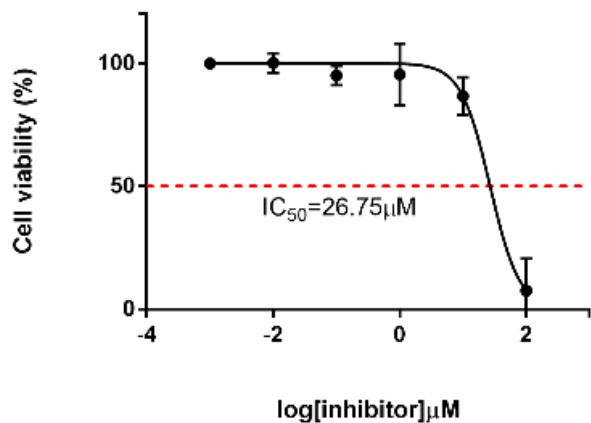

T47D Log curve of 3c

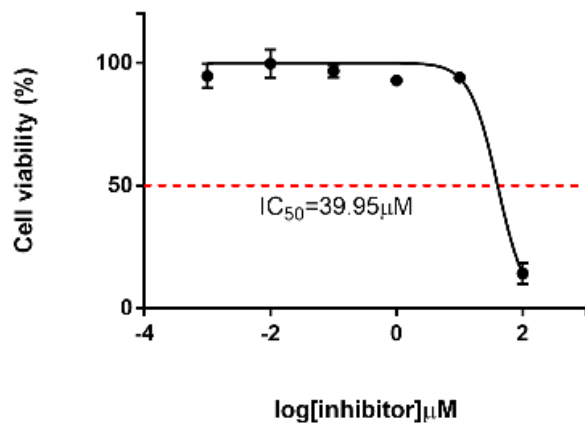

BT474 Log curve of 3c

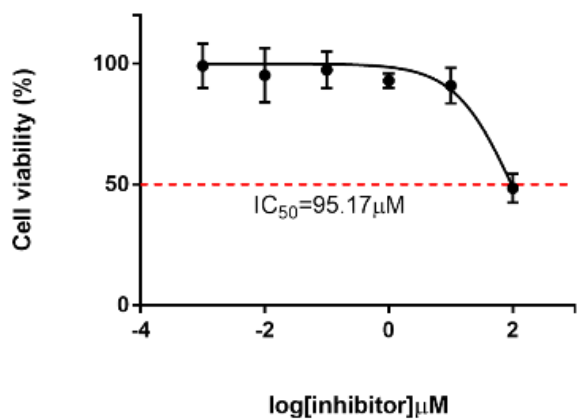

SK-BR-3 log curve of 3c

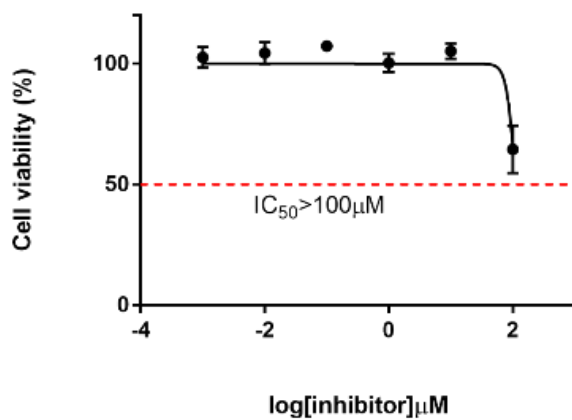

MCF-10A log curve of 3c

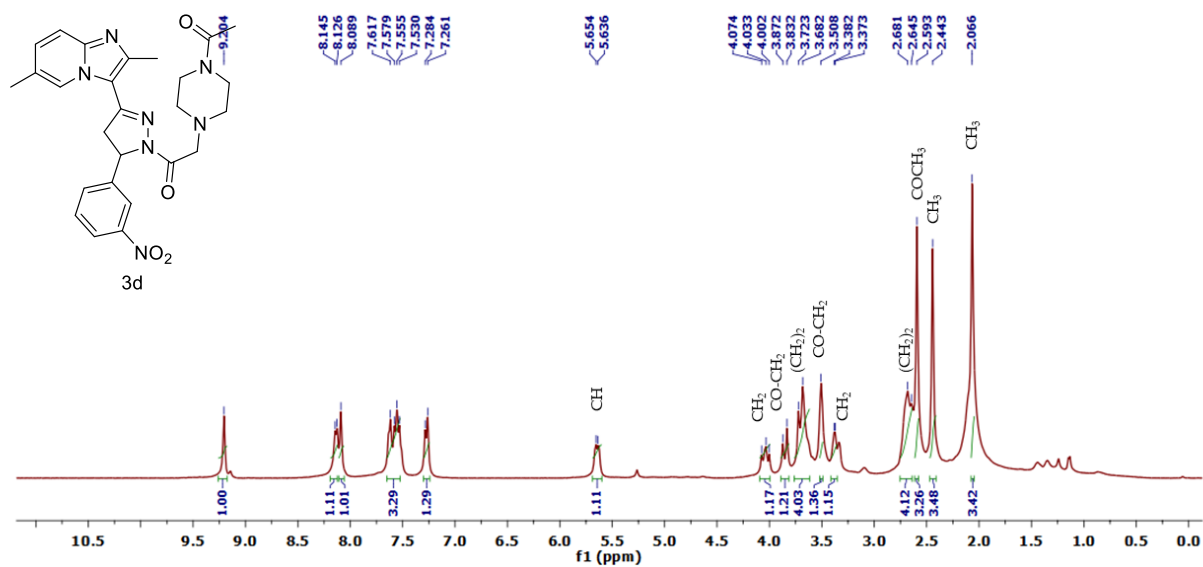

$^1\text{H}$  NMR of **3d**

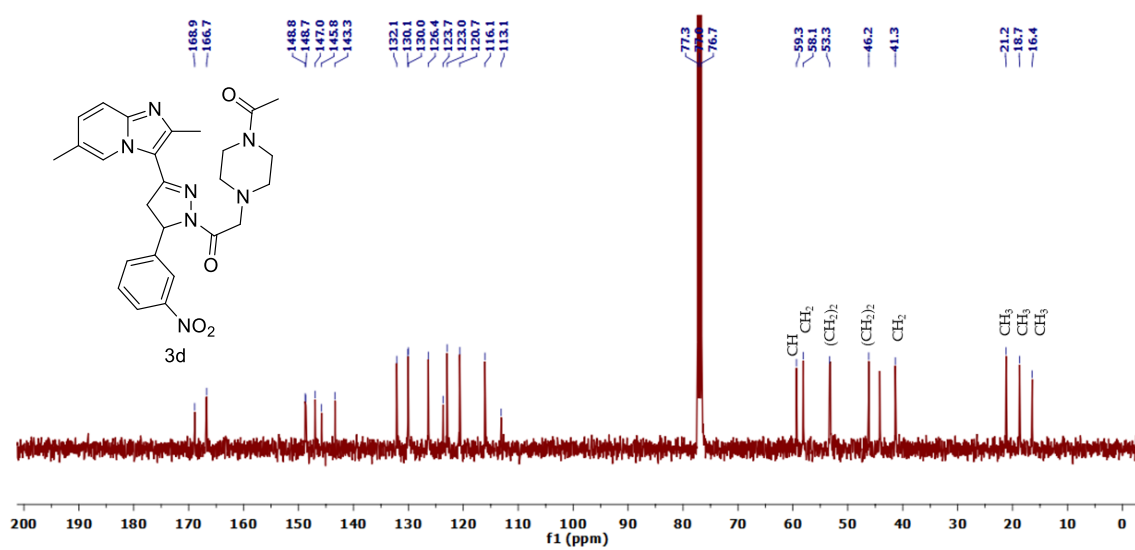

$^{13}\text{C}$  NMR of **3d**

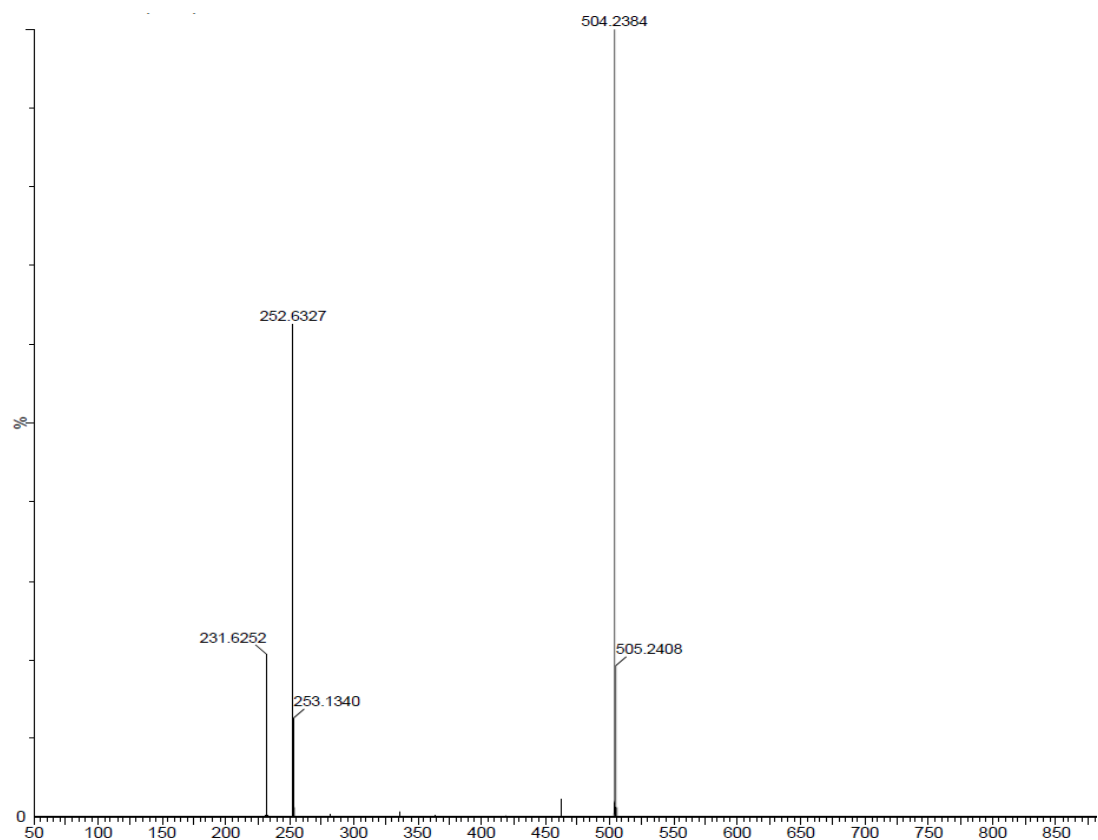

Mass spectra of **3d**

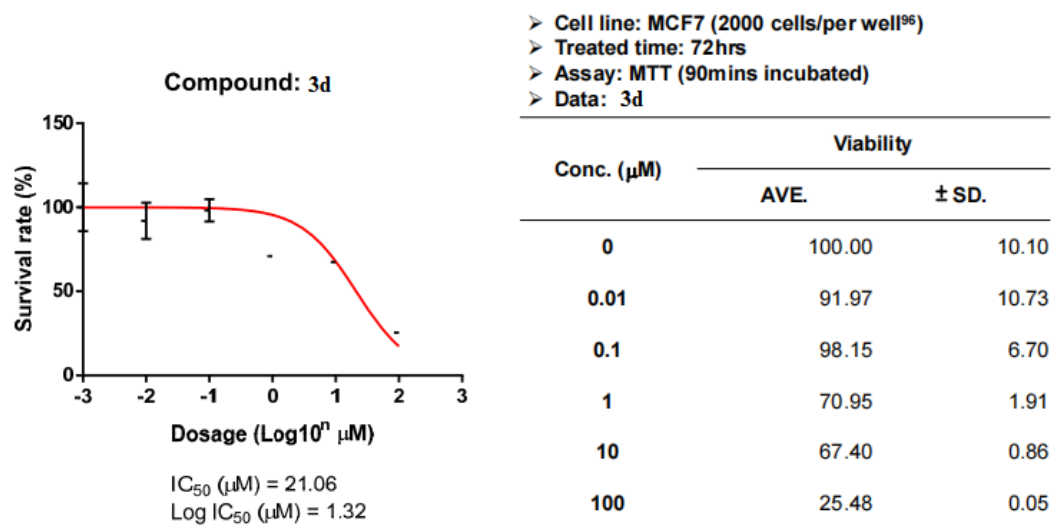

MCF-7 Log curve of **3d**

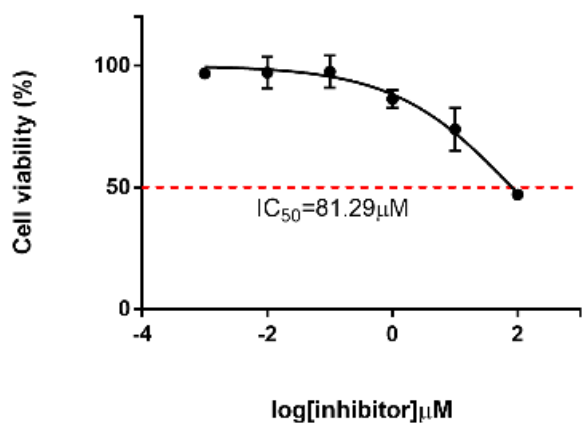

T47D Log curve of 3d

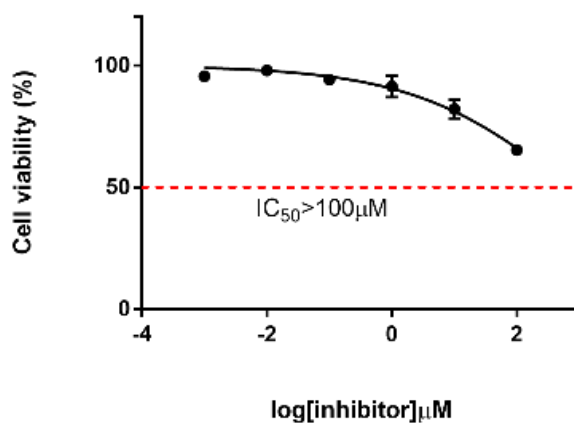

BT474 Log curve of 3d

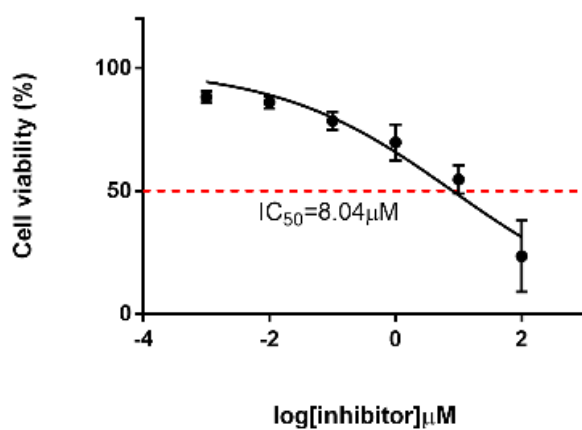

SK-BR-3 log curve of 3d

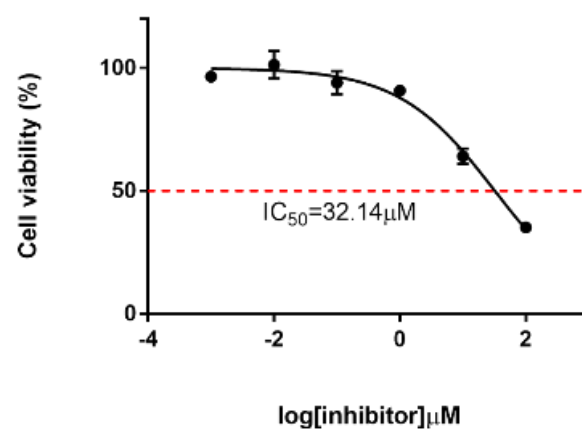

MCF-10A log curve of 3d

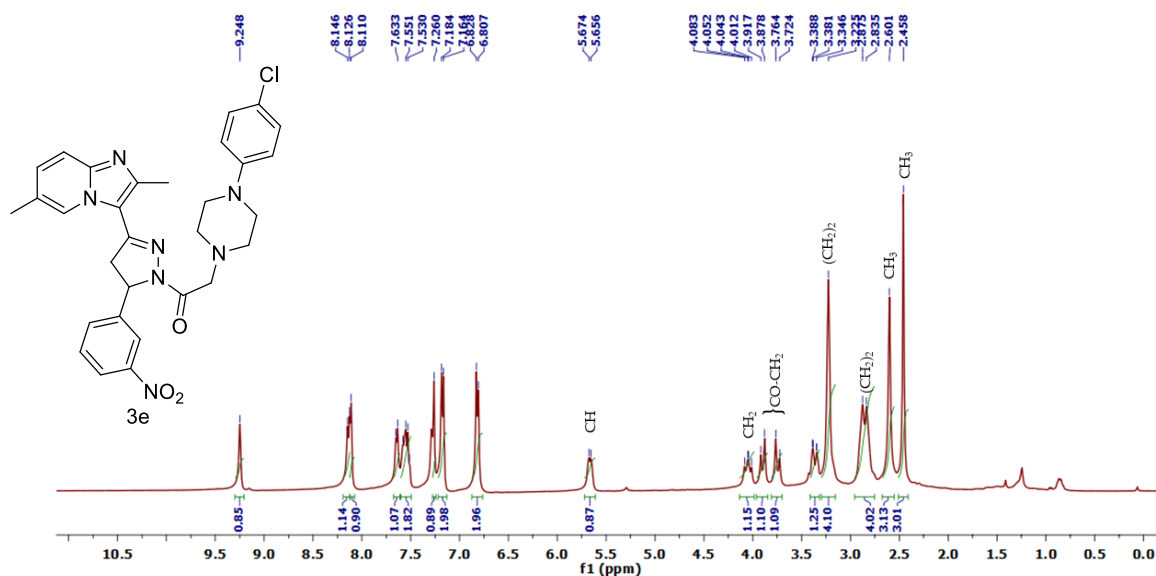

$^1H$  NMR of 3e

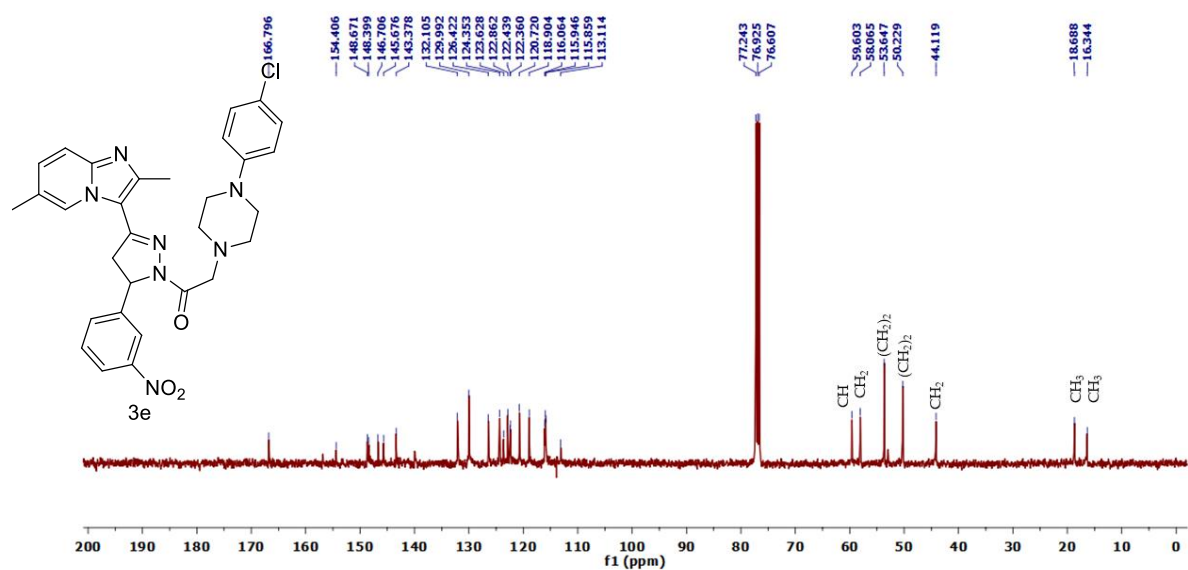

<sup>13</sup>C NMR of 3e

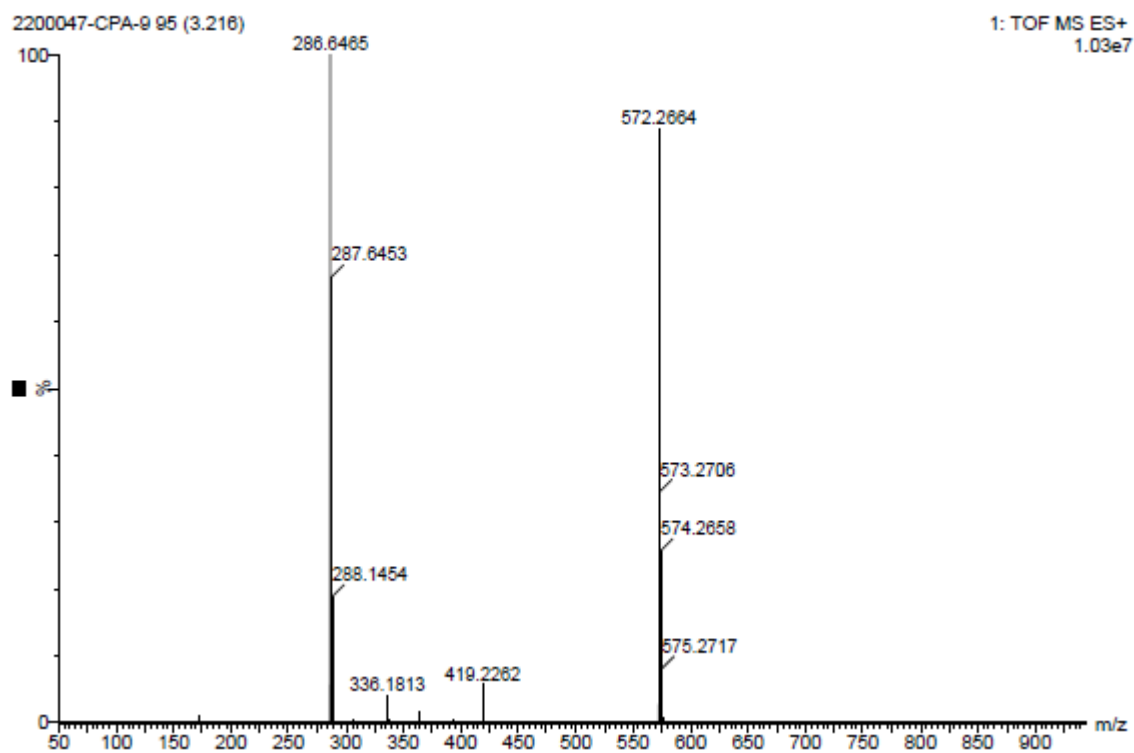

Mass spectra of compound 3e

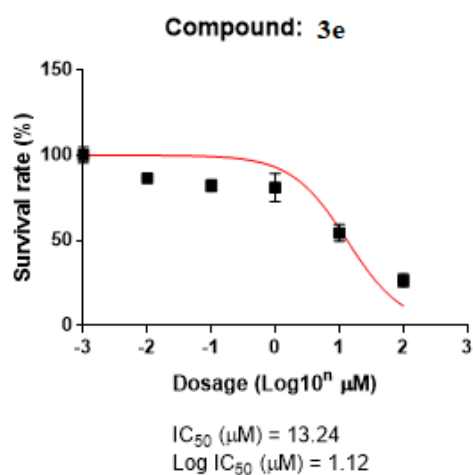

> Cell line: MCF7 (2000 cells/per well<sup>96</sup>)  
 > Treated time: 72hrs  
 > Assay: alamarBlue (4hrs incubated)  
 > Data: 3e

| Conc. ( $\mu\text{M}$ ) | Viability |           |
|-------------------------|-----------|-----------|
|                         | AVE.      | $\pm$ SD. |
| 0                       | 100.00    | 4.64      |
| 0.01                    | 86.60     | 1.67      |
| 0.1                     | 82.25     | 3.61      |
| 1                       | 81.12     | 8.26      |
| 10                      | 54.43     | 4.91      |
| 100                     | 26.54     | 3.76      |

MCF-7 Log curve of 3e

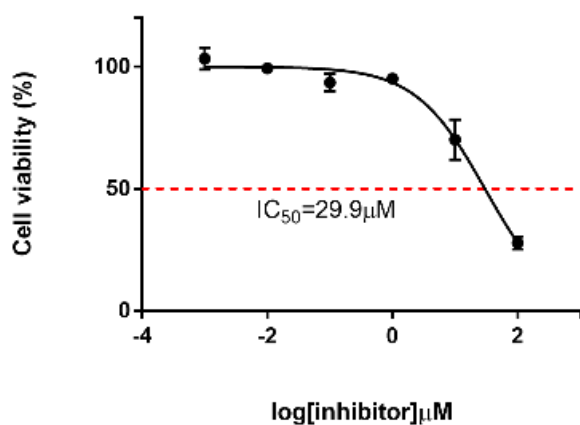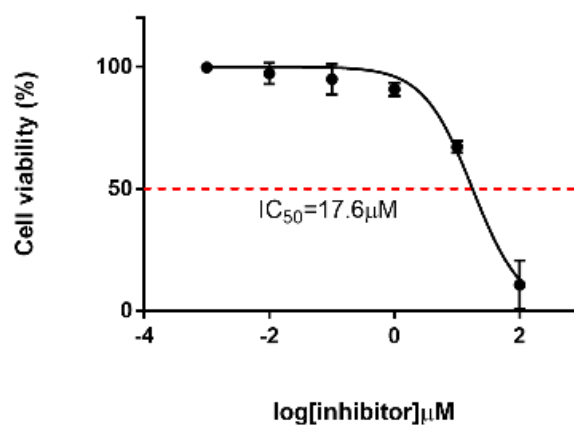

T47D Log curve of 3e

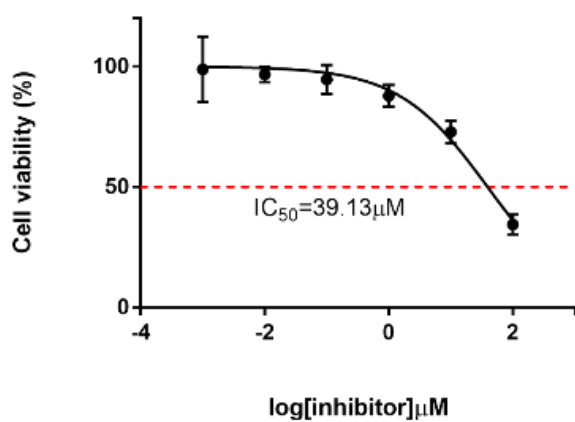

BT474 Log curve of 3e

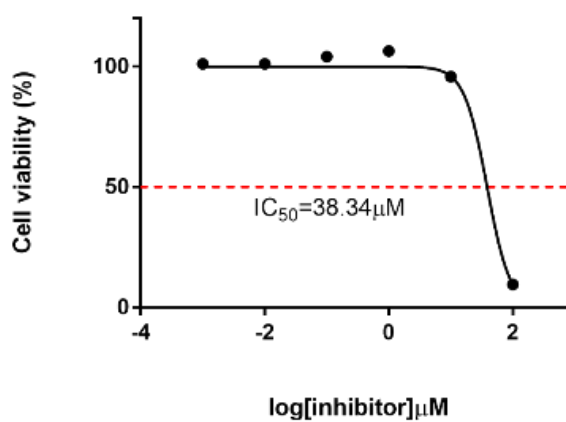

SK-BR-3 log curve of 3e

MCF-10A log curve of 3e

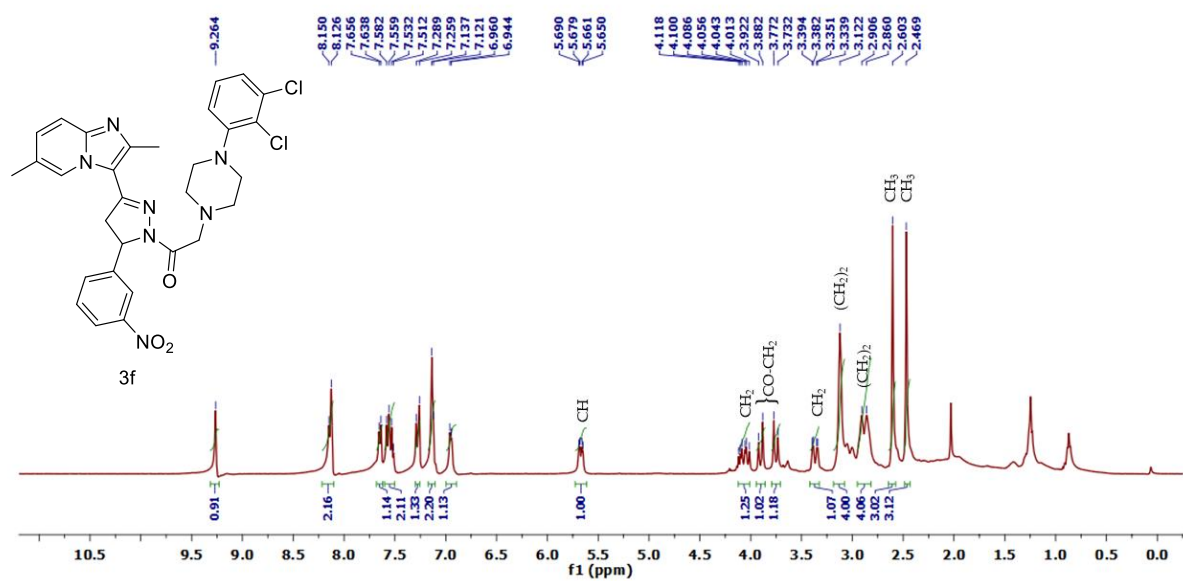

<sup>1</sup>H NMR of 3f

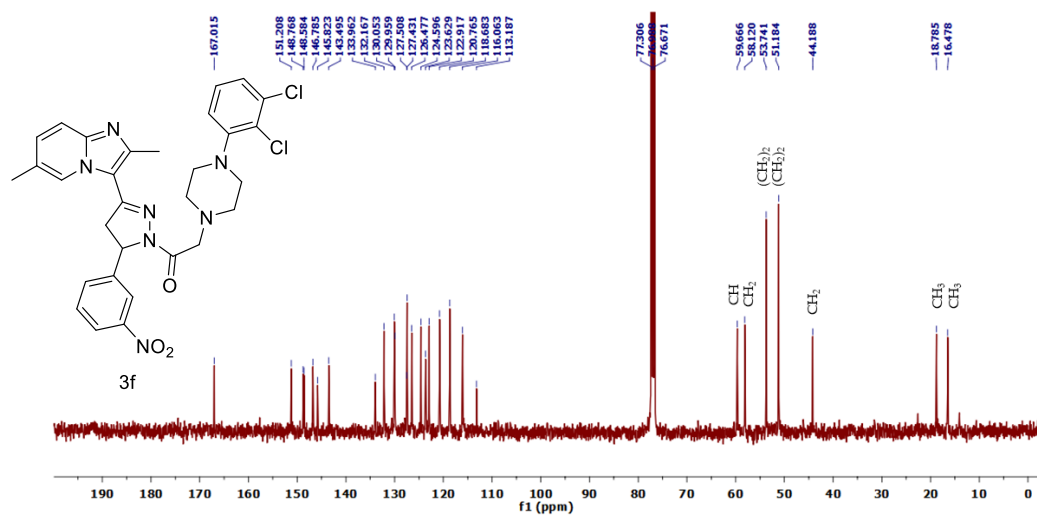

<sup>13</sup>C NMR of 3f



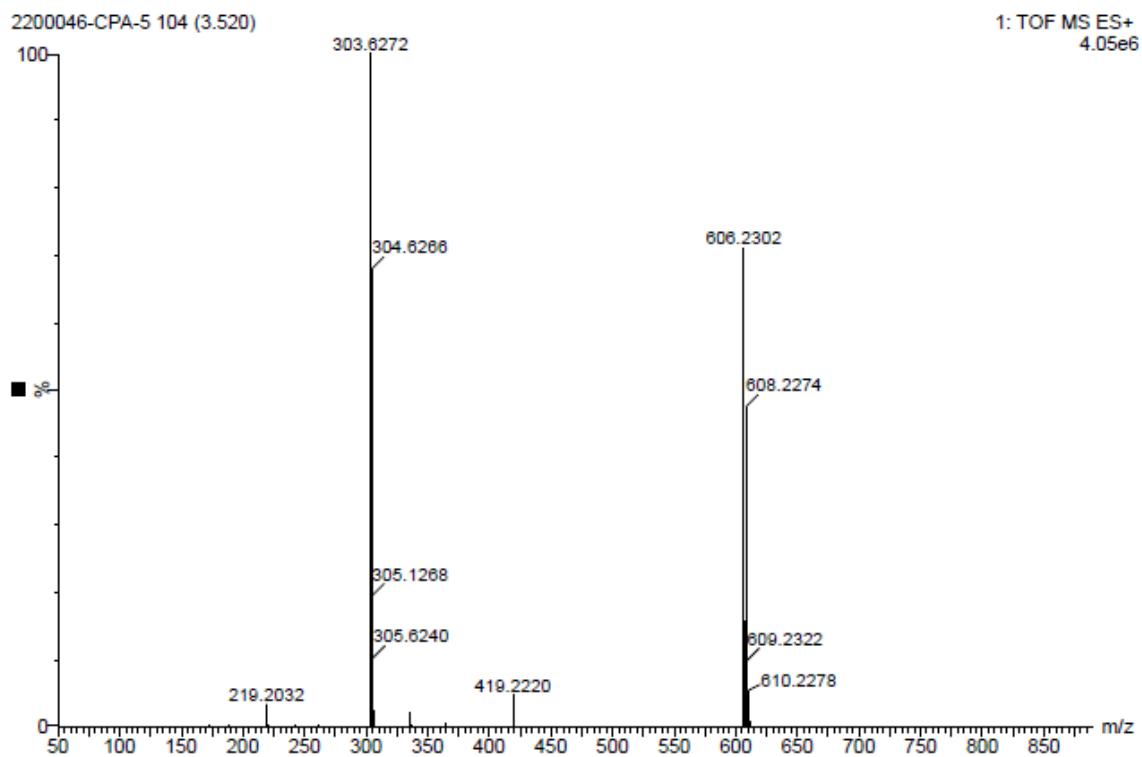

Mass spectra of **3f**

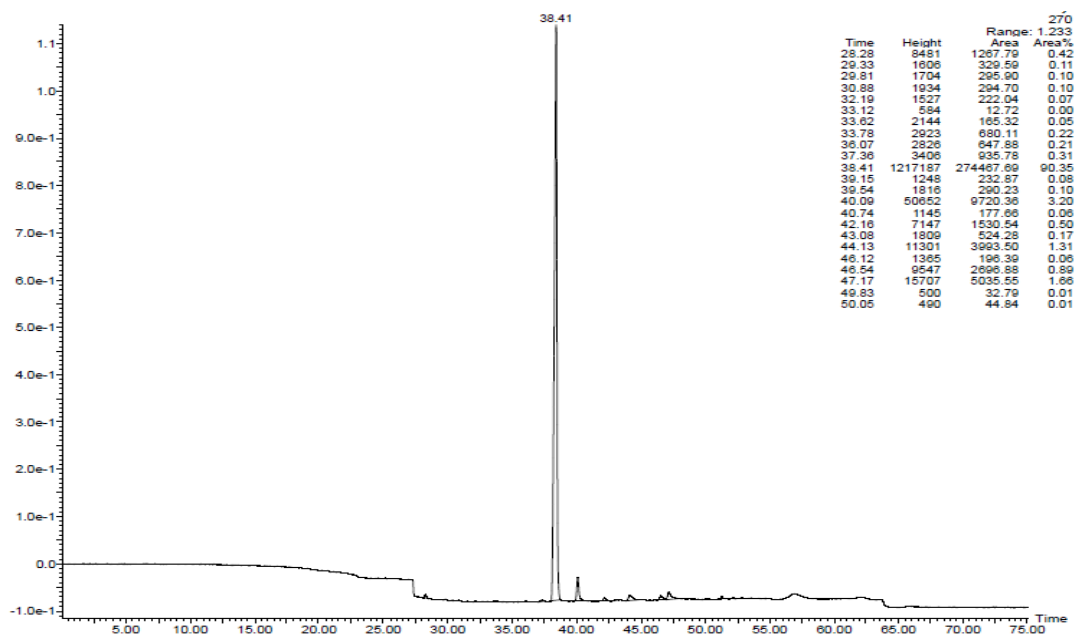

HPLC of **3f**

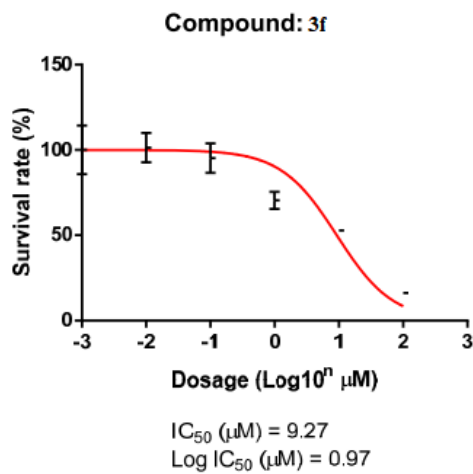

- Cell line: MCF7 (2000 cells/per well<sup>96</sup>)
- Treated time: 72hrs
- Assay: MTT (90mins incubated)
- Data: 3f

| Conc. ( $\mu\text{M}$ ) | Viability |           |
|-------------------------|-----------|-----------|
|                         | AVE.      | $\pm$ SD. |
| 0                       | 100.00    | 10.10     |
| 0.01                    | 101.30    | 8.59      |
| 0.1                     | 95.19     | 8.64      |
| 1                       | 70.46     | 5.03      |
| 10                      | 52.84     | 1.47      |
| 100                     | 16.14     | 0.59      |

MCF-7 Log curve of 3f

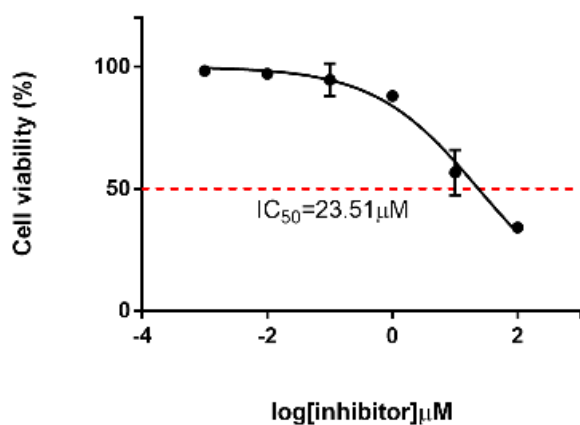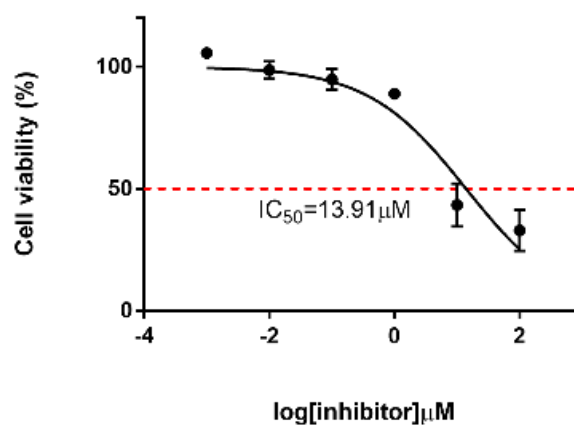

T47D Log curve of 3f

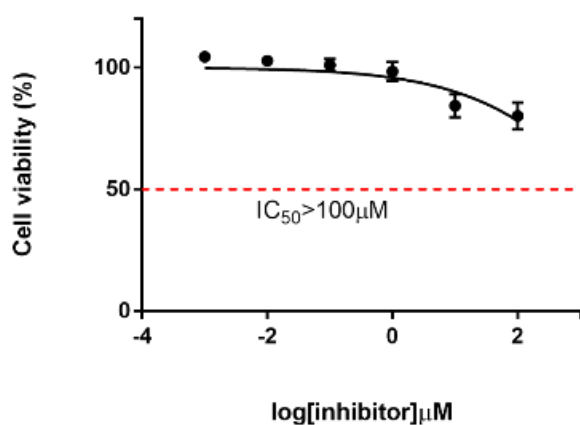

BT474 Log curve of 3f

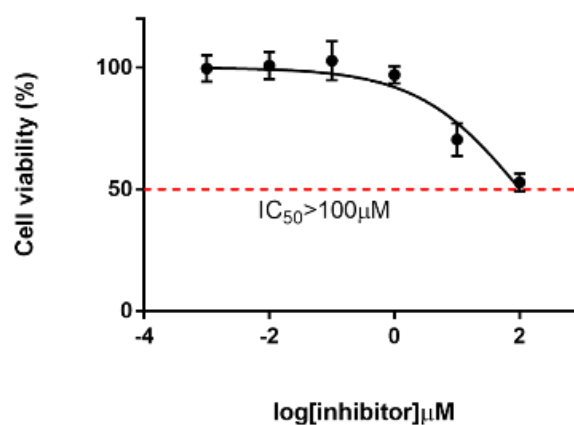

SK-BR-3 log curve of 3f

MCF-10A log curve of 3f

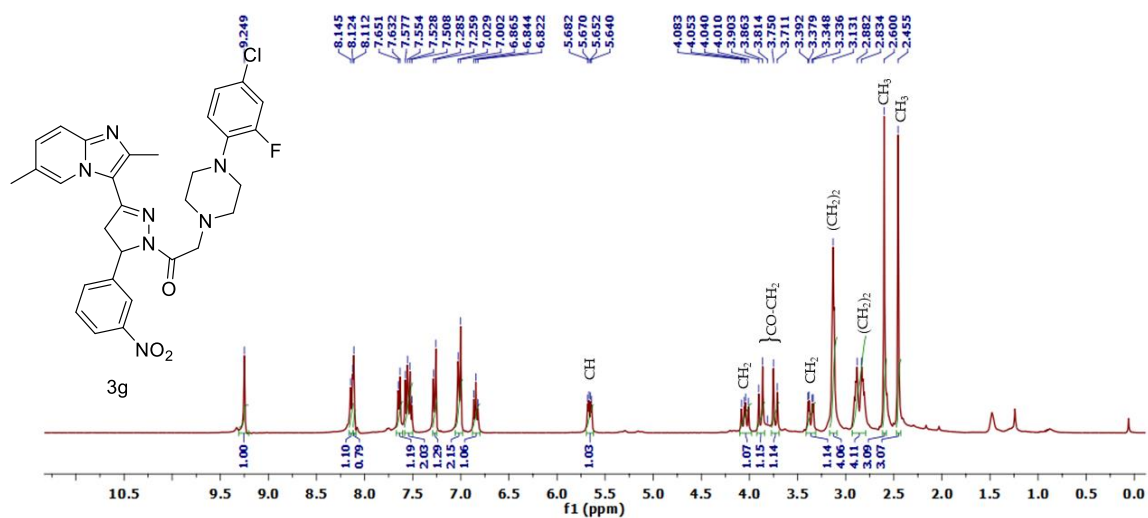

<sup>1</sup>H NMR of 3g

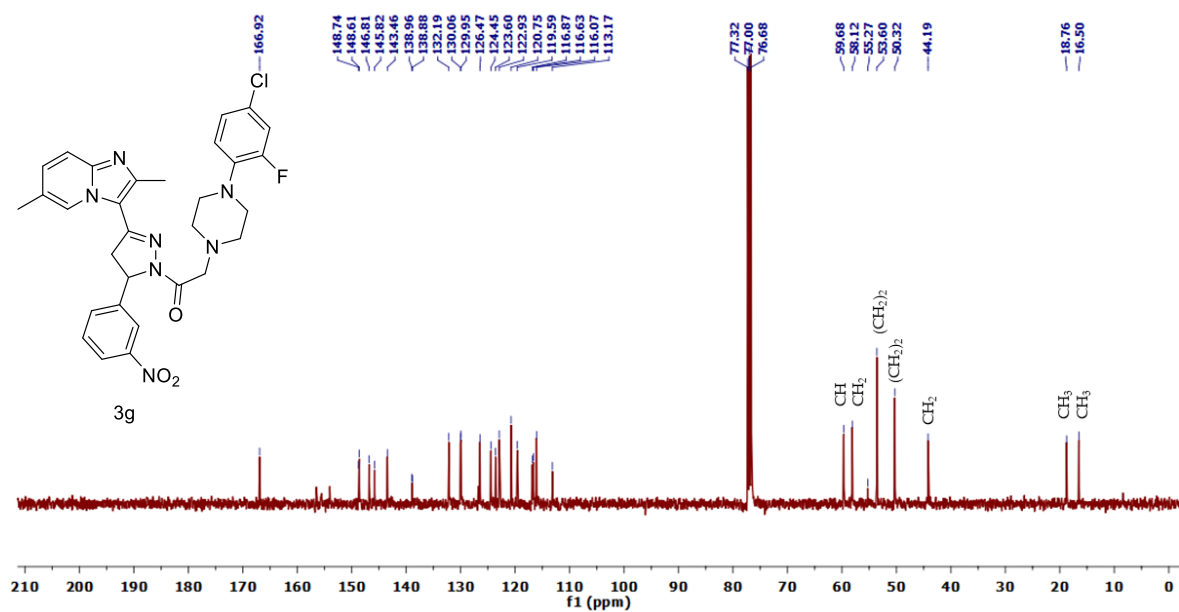

<sup>13</sup>C NMR of 3g

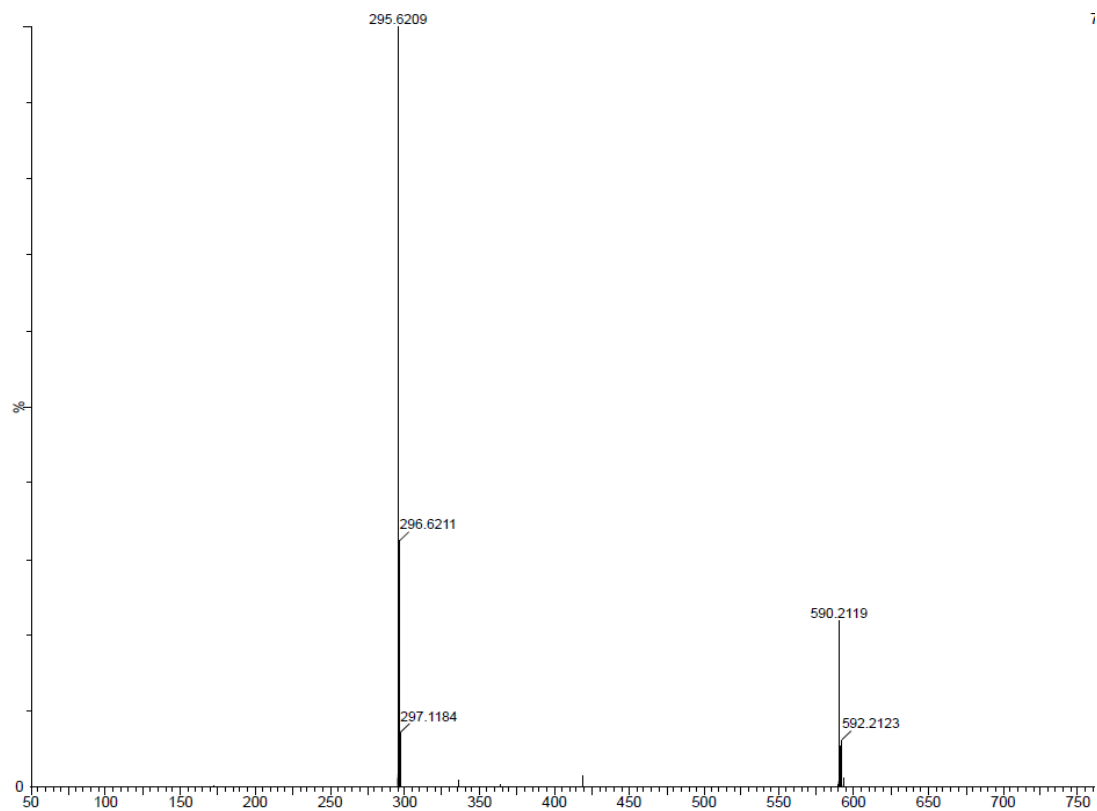

Mass spectra of 3g

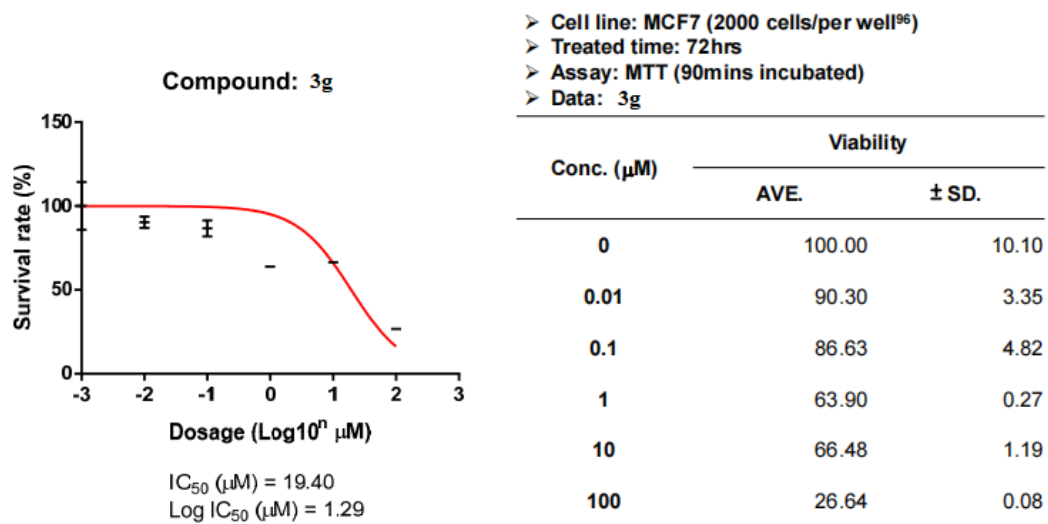

MCF-7 Log curve of 3g

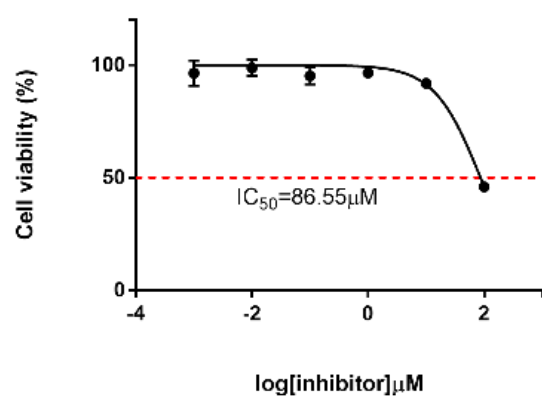

T47D Log curve of 3g

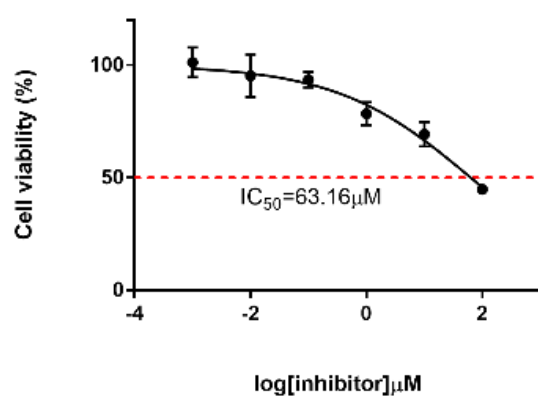

BT474 Log curve of 3g

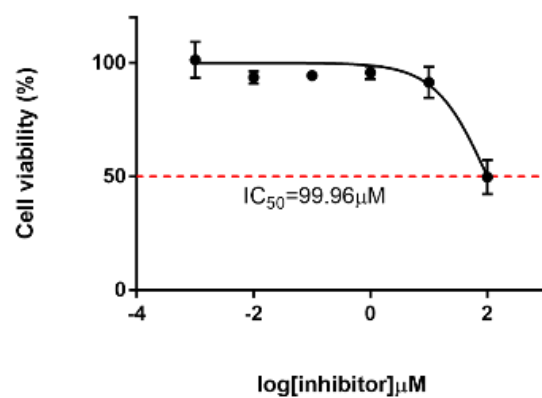

SK-BR-3 log curve of 3g

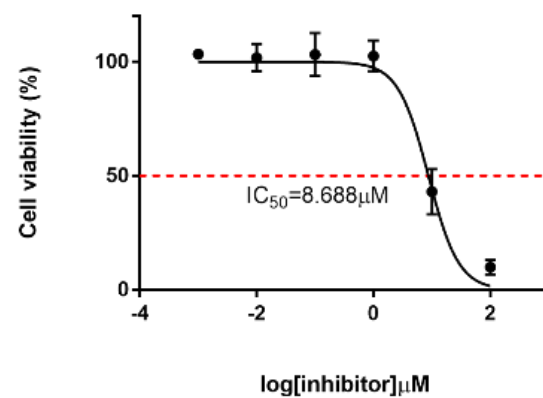

MCF-10A log curve of 3g

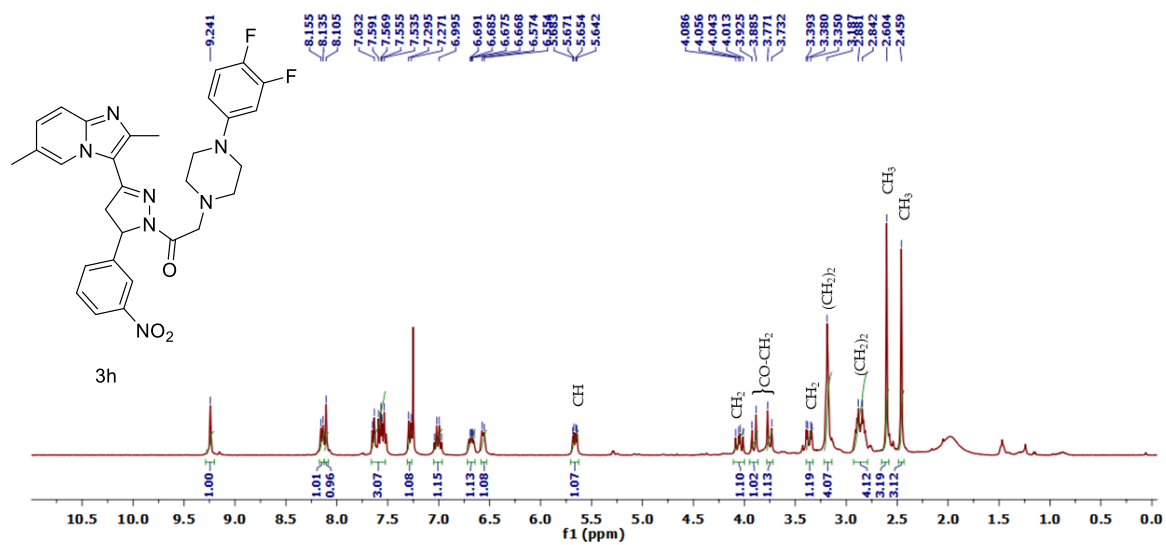

<sup>1</sup>H NMR of 3h

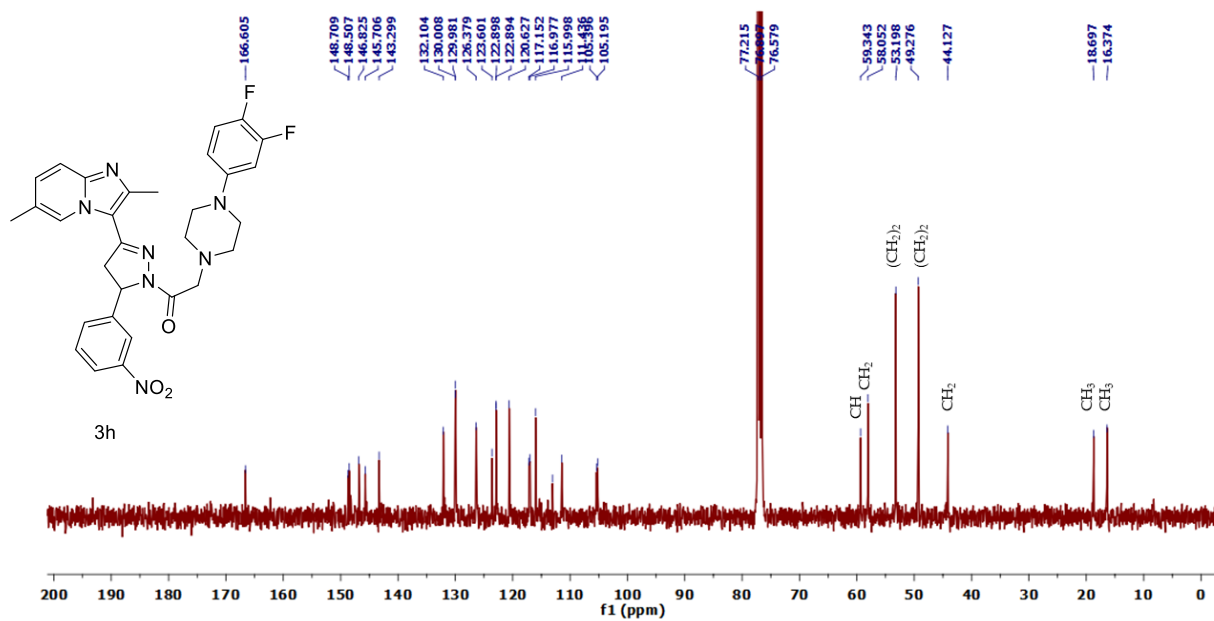

<sup>13</sup>C NMR of 3h

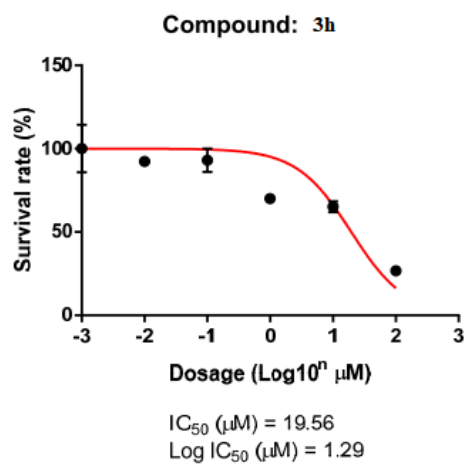

➤ Cell line: MCF7 (2000 cells/per well<sup>96</sup>)  
 ➤ Treated time: 72hrs  
 ➤ Assay: MTT (90mins incubated)  
 ➤ Data: 3h

| Conc. ( $\mu\text{M}$ ) | Viability |           |
|-------------------------|-----------|-----------|
|                         | AVE.      | $\pm$ SD. |
| 0                       | 100.00    | 10.10     |
| 0.01                    | 92.34     | 0.73      |
| 0.1                     | 93.00     | 7.07      |
| 1                       | 70.06     | 1.19      |
| 10                      | 65.18     | 3.20      |
| 100                     | 26.74     | 1.54      |

MCF-7 Log curve of 3h

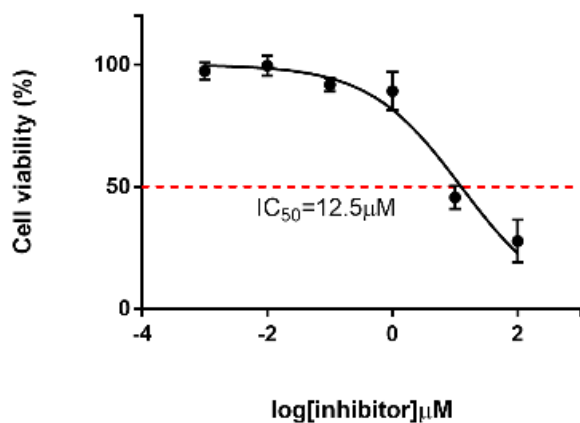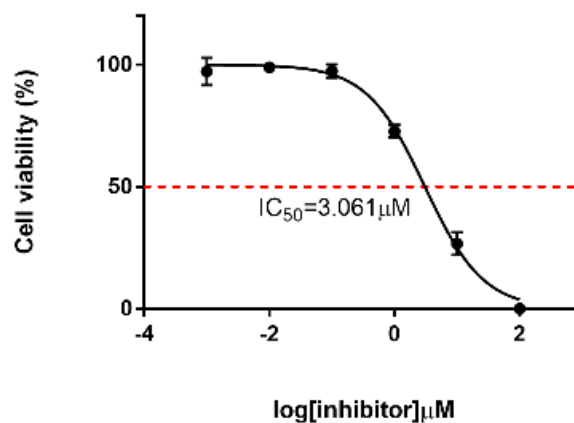

T47D Log curve of 3h

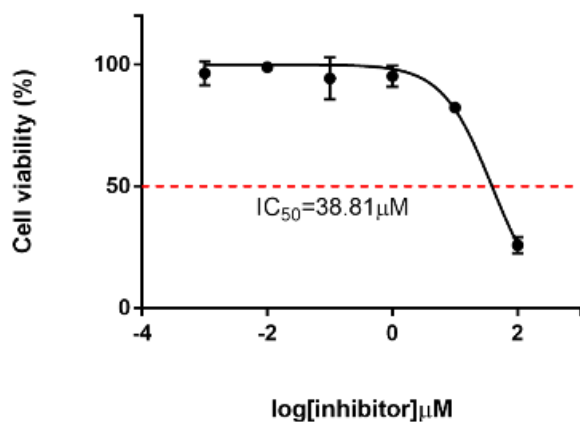

BT474 Log curve of 3h

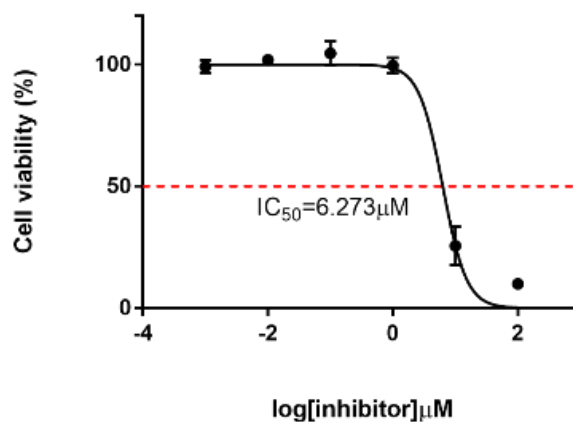

SK-BR-3 log curve of 3h

MCF-10A log curve of 3h

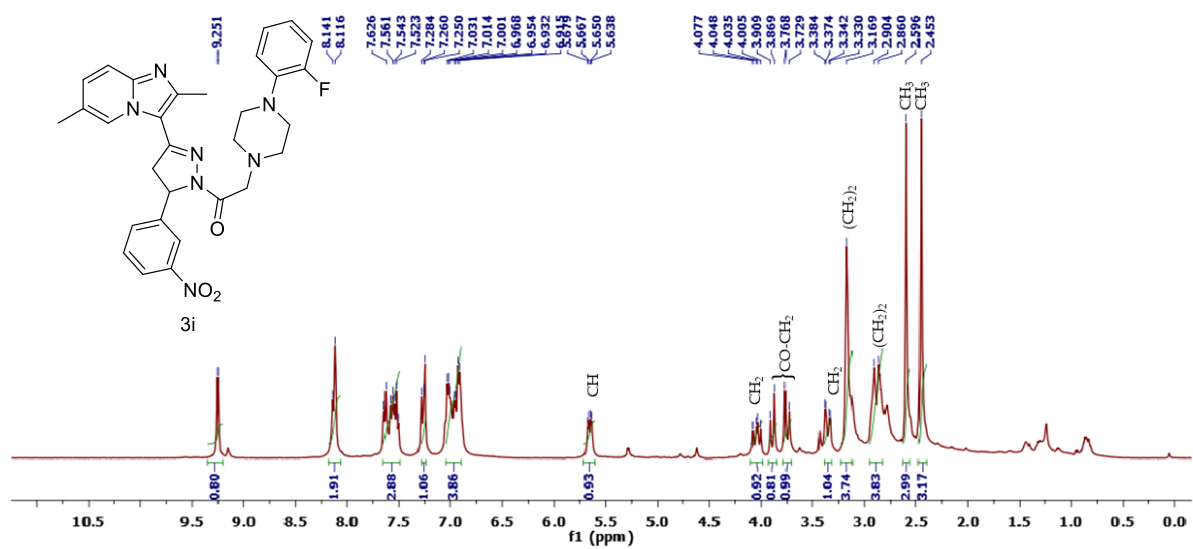

<sup>1</sup>H NMR of 3i

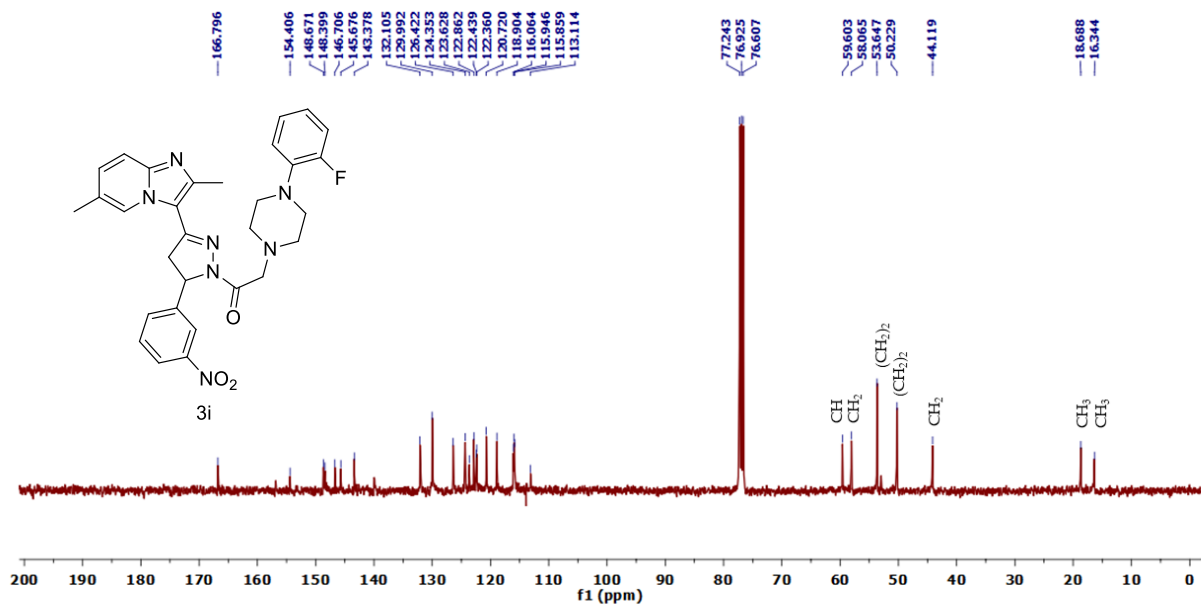

<sup>13</sup>C NMR of 3i



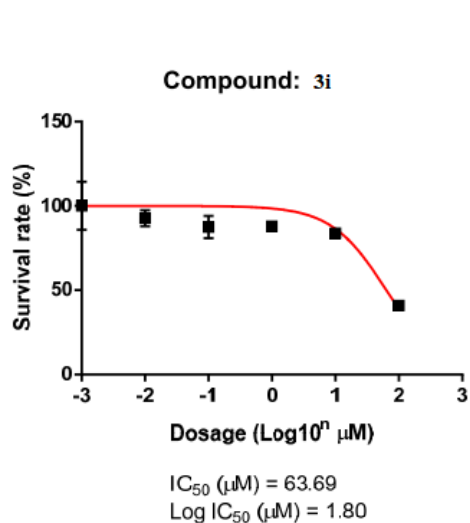

- Cell line: MCF7 (2000 cells/per well<sup>96</sup>)
- Treated time: 72hrs
- Assay: MTT (90mins incubated)
- Data: 3i

| Conc. (μM) | Viability |       |
|------------|-----------|-------|
|            | AVE.      | ± SD. |
| 0          | 100.00    | 10.10 |
| 0.01       | 92.65     | 4.79  |
| 0.1        | 87.45     | 6.60  |
| 1          | 87.89     | 1.99  |
| 10         | 83.77     | 1.75  |
| 100        | 40.98     | 0.58  |

MCF-7 Log curve of 3i

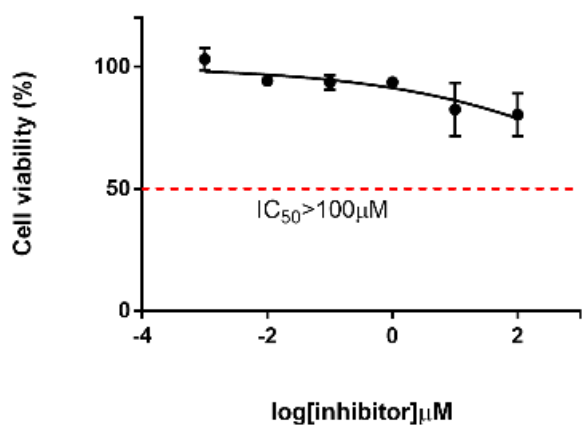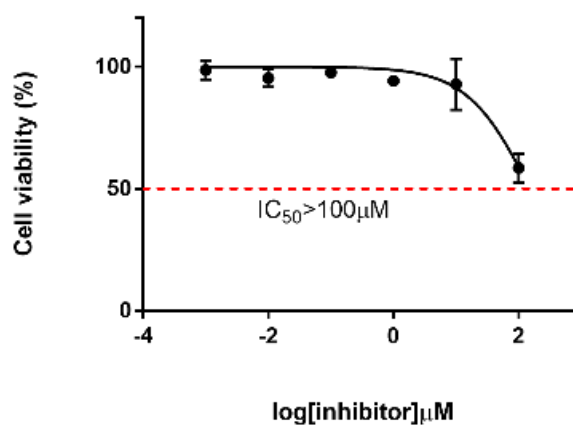

T47D Log curve of 3i

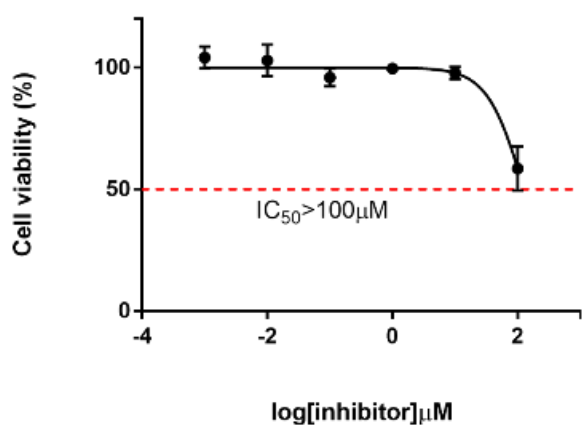

BT474 Log curve of 3i

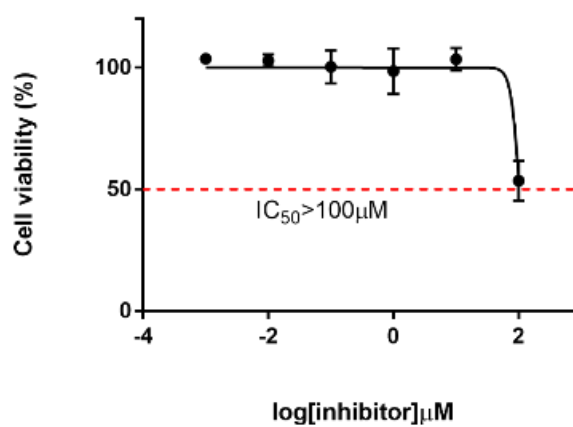

SK-BR-3 log curve of 3i

MCF-10A log curve of 3i

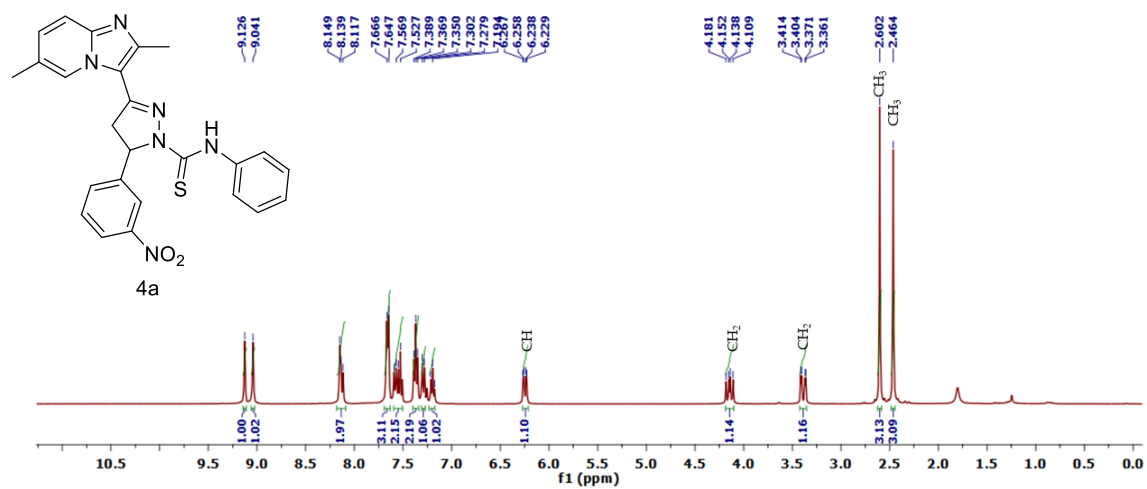

$^1\text{H}$  NMR of **4a**

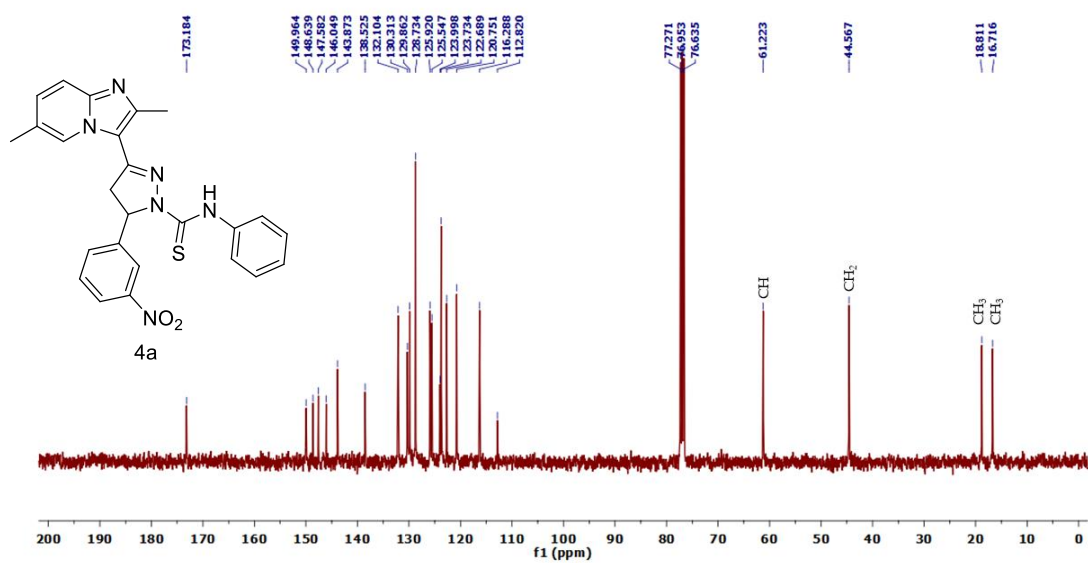

$^{13}\text{C}$  NMR of **4a**

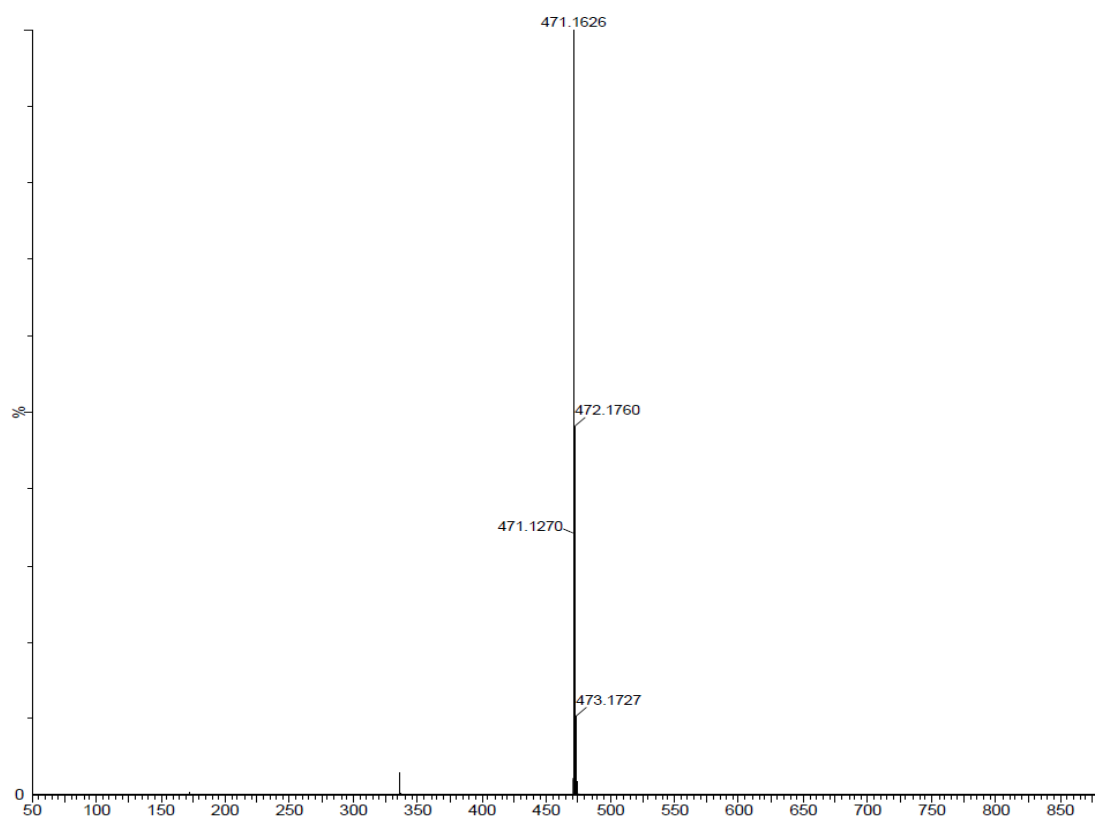

Mass spectra of **4a**

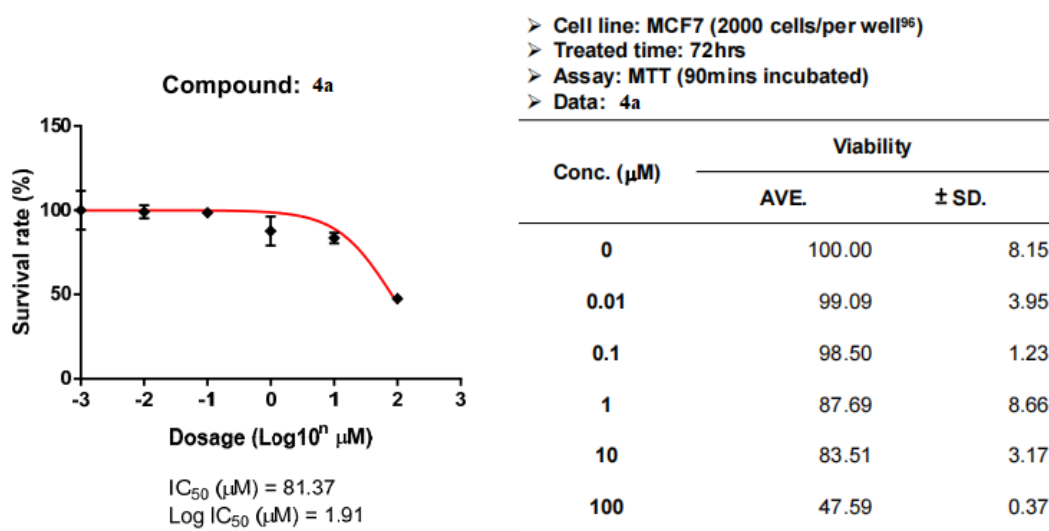

MCF-7 Log curve of **4a**

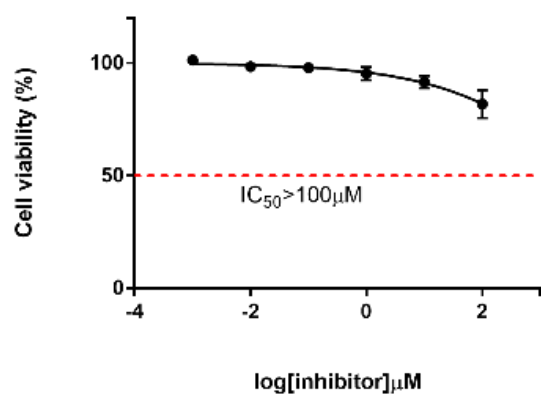

T47D Log curve of 4a

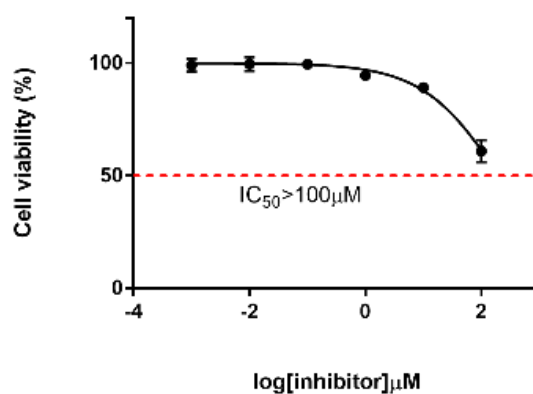

BT474 Log curve of 4a

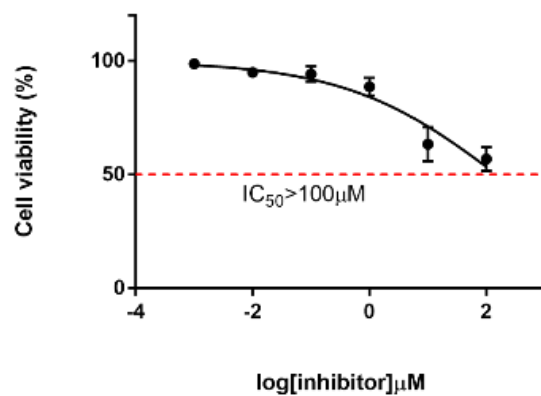

SK-BR-3 log curve of 4a

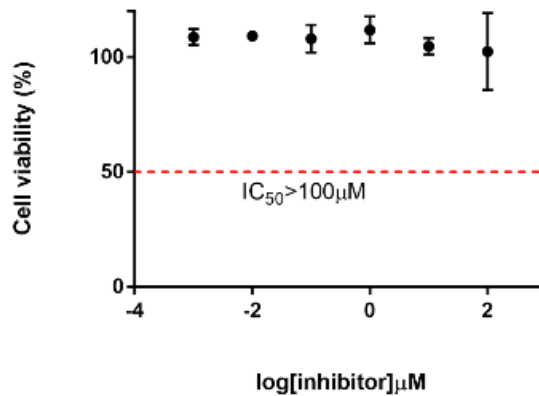

MCF-10A log curve of 4a

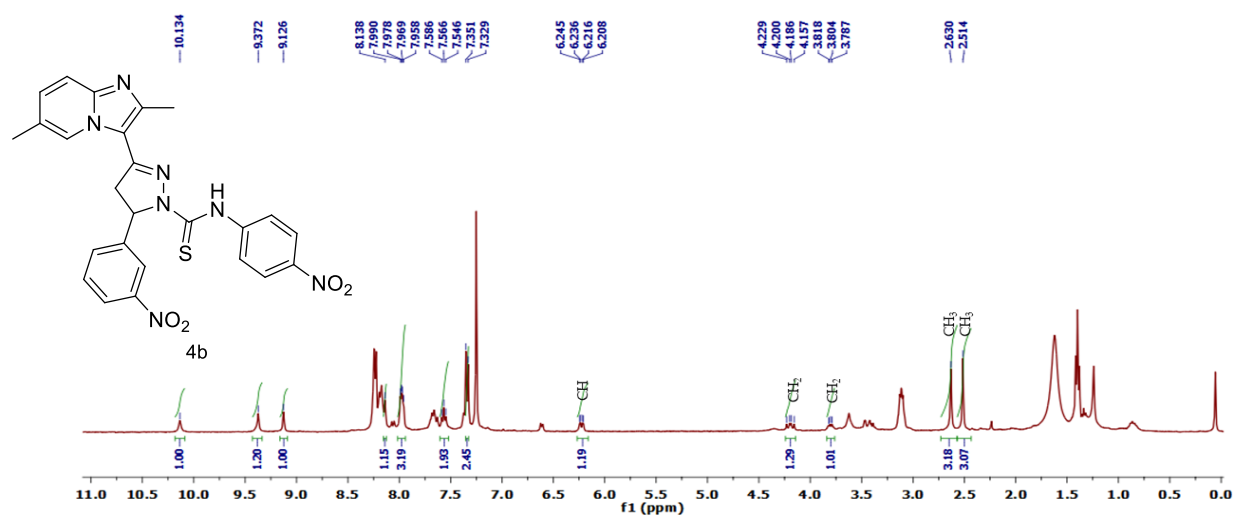

$^1H$  NMR of 4b

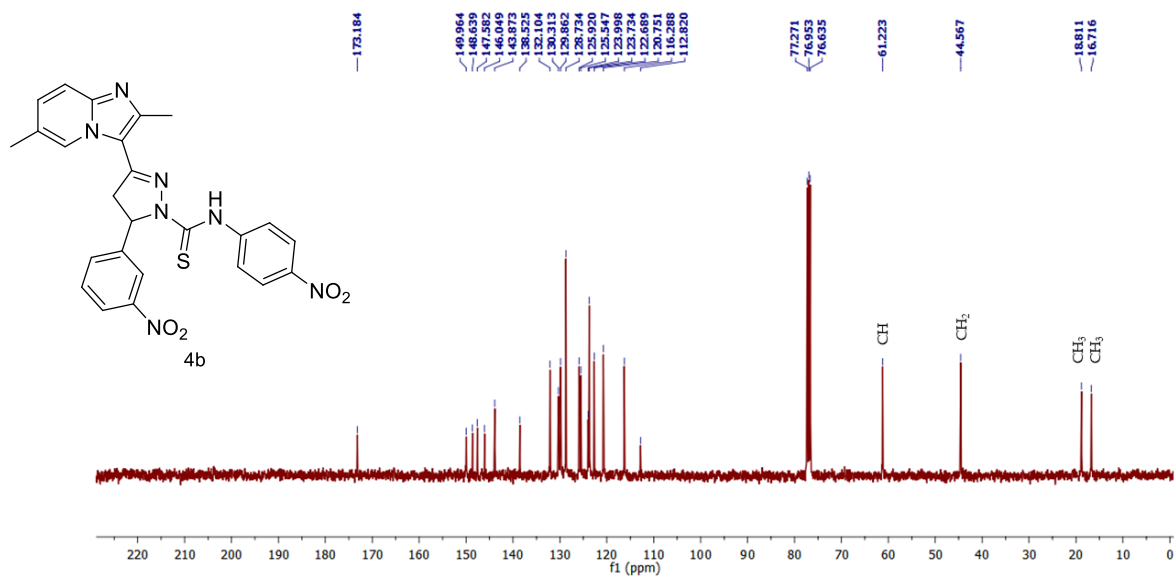

$^{13}\text{C}$  NMR of **4b**

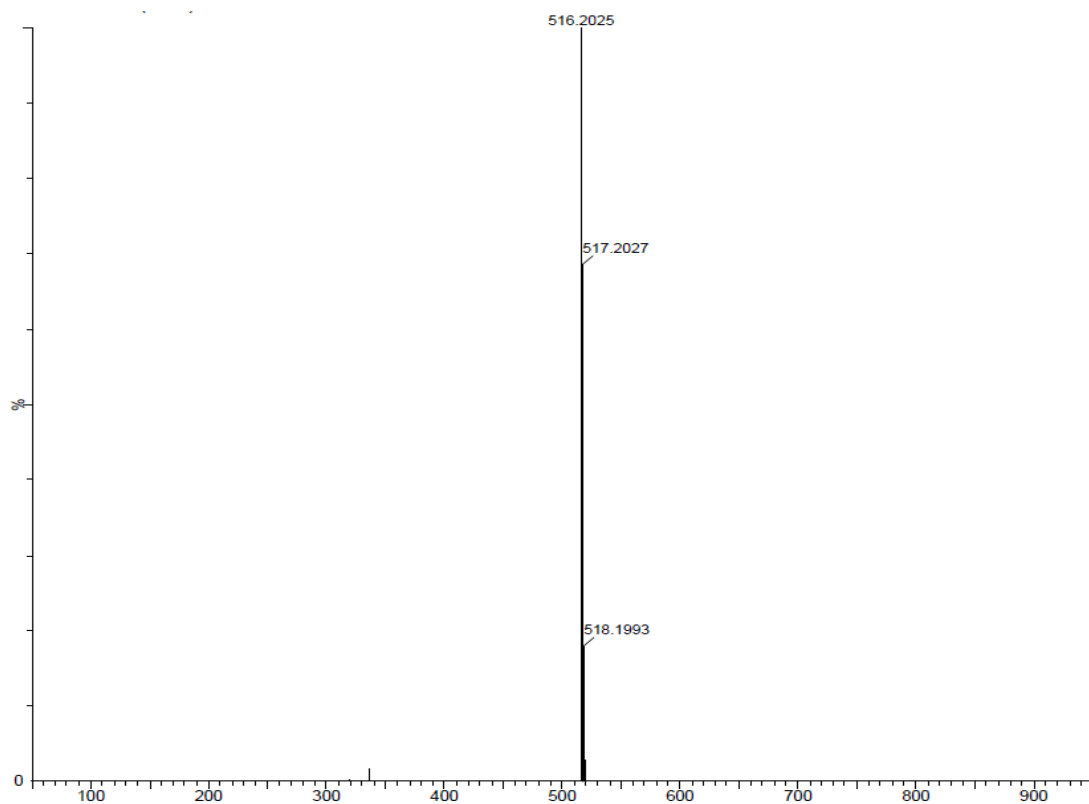

Mass spectra of **4b**

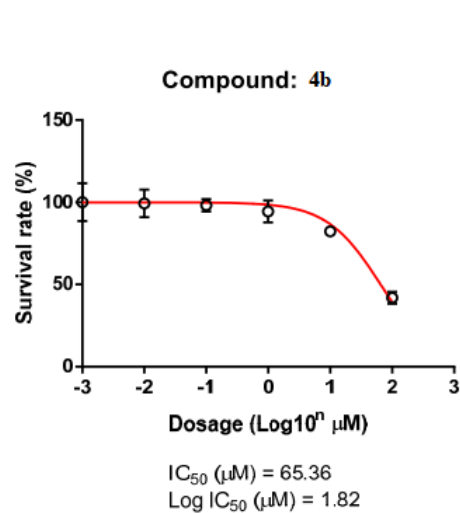

- Cell line: MCF7 (2000 cells/per well<sup>96</sup>)
- Treated time: 72hrs
- Assay: MTT (90mins incubated)
- Data: 4b

| Conc. ( $\mu\text{M}$ ) | Viability |           |
|-------------------------|-----------|-----------|
|                         | AVE.      | $\pm$ SD. |
| 0                       | 100.00    | 8.15      |
| 0.01                    | 99.30     | 8.37      |
| 0.1                     | 98.13     | 3.79      |
| 1                       | 94.47     | 6.67      |
| 10                      | 82.35     | 0.89      |
| 100                     | 41.89     | 3.66      |

MCF-7 Log curve of 4b

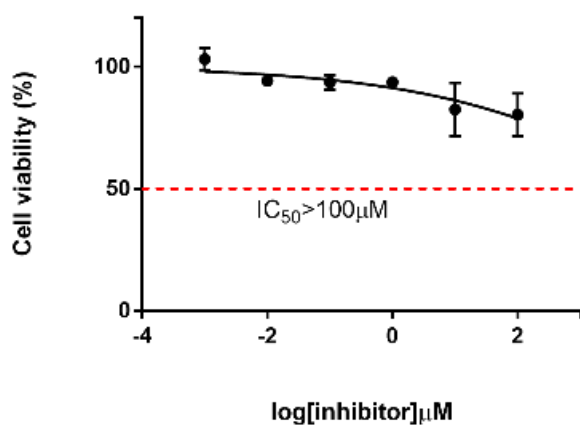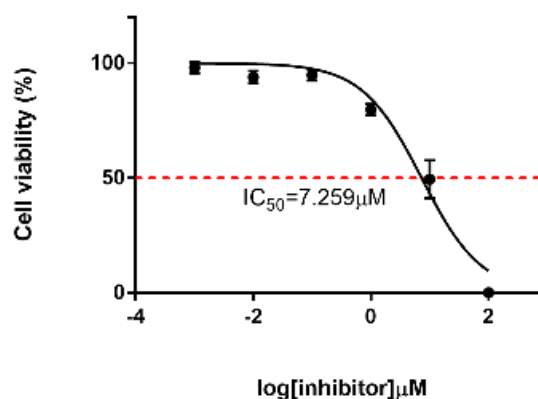

T47D Log curve of 4b

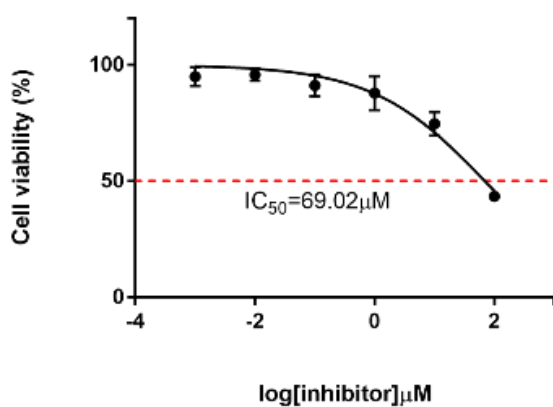

BT474 Log curve of 4b

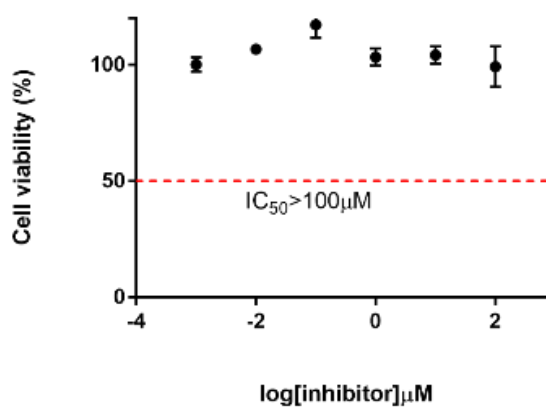

SK-BR-3 log curve of 4b

MCF-10A log curve of 4b

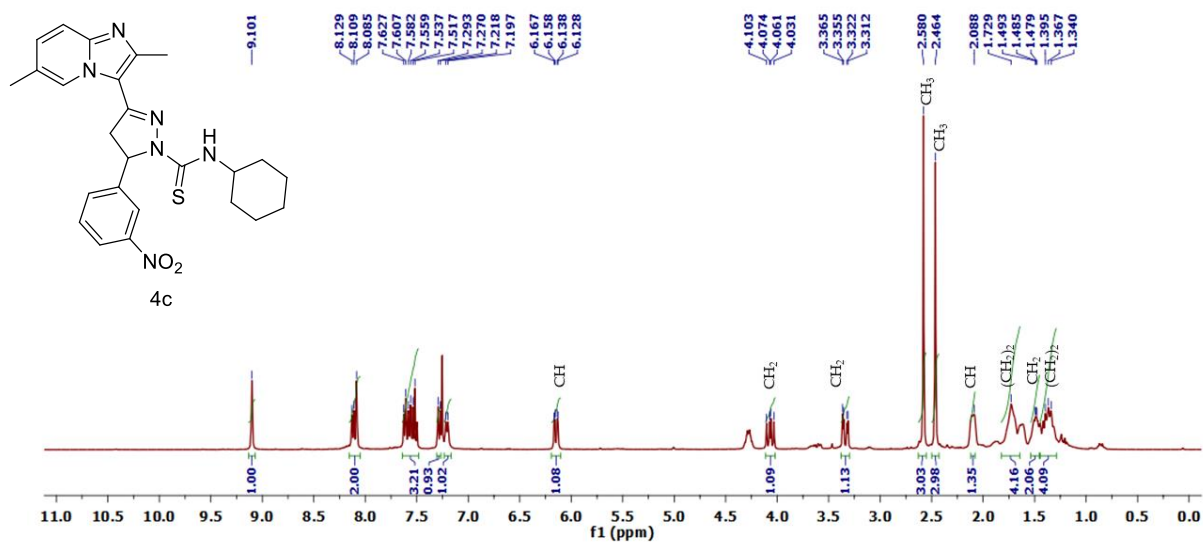

$^1\text{H}$  NMR of 4c

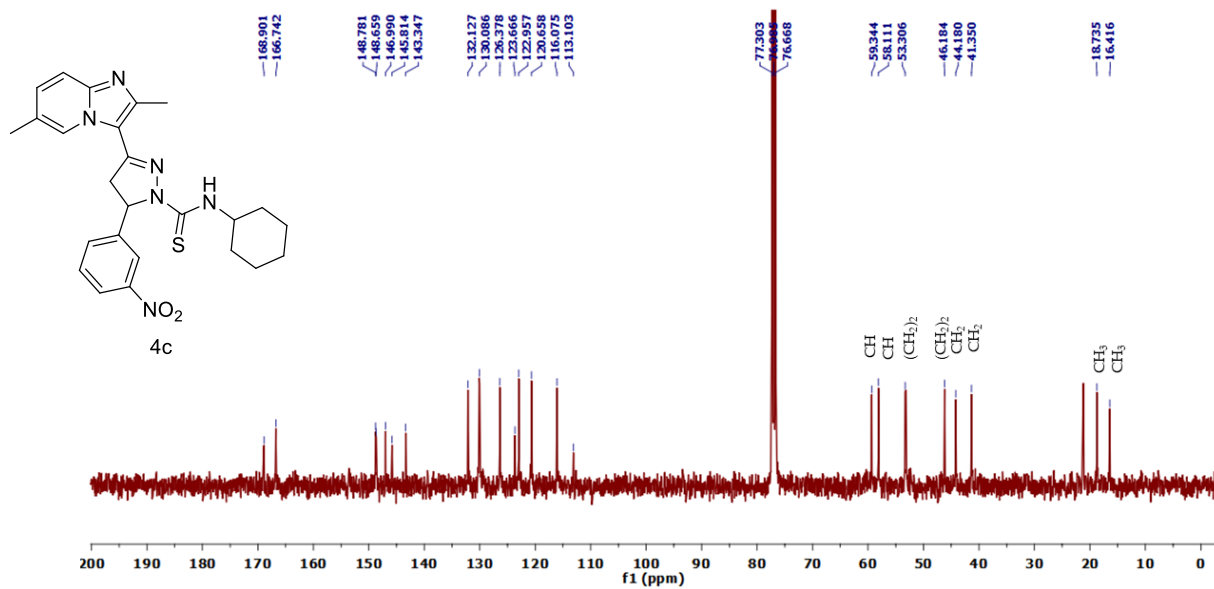

$^{13}\text{C}$  NMR of 4c

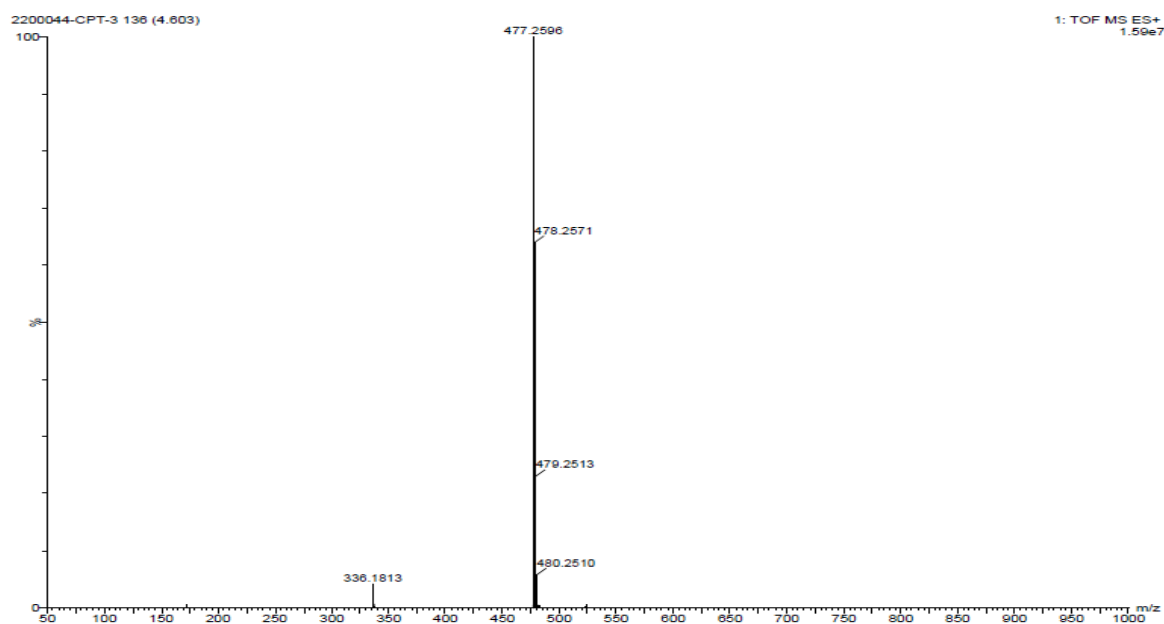

Mass spectra of compound 4c

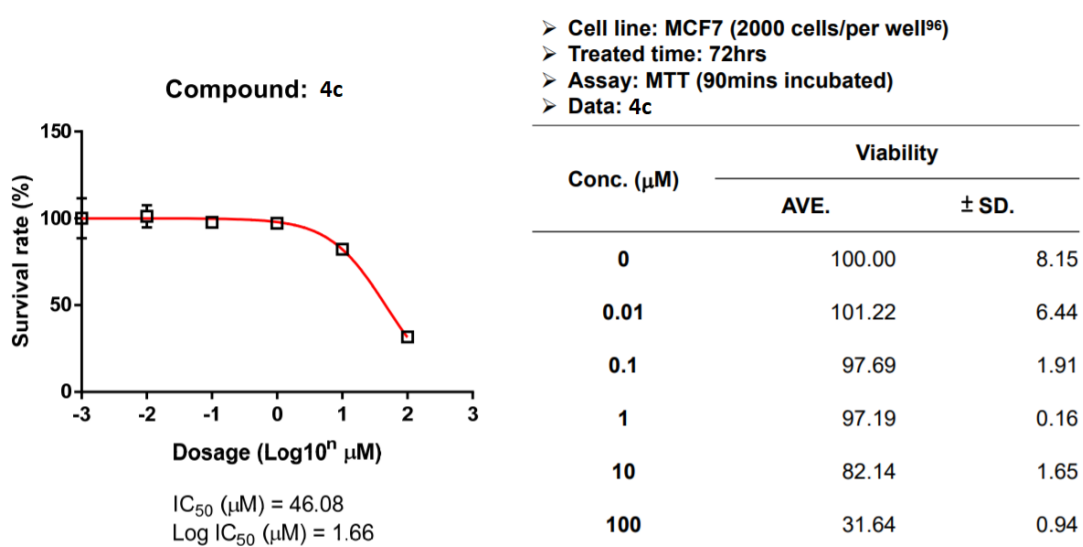

MCF-7 Log curve of 4c



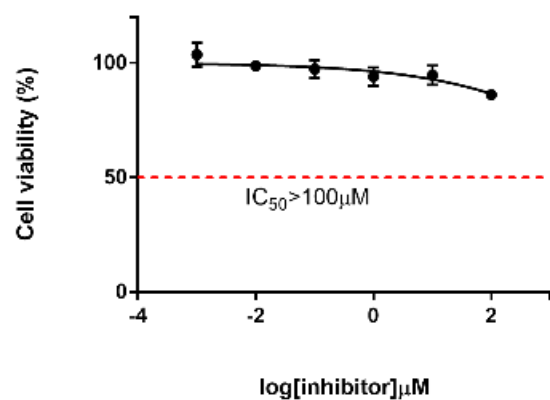

T47D Log curve of 4c

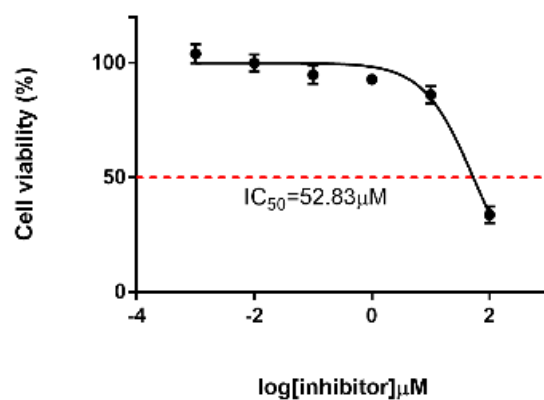

BT474 Log curve of 4c

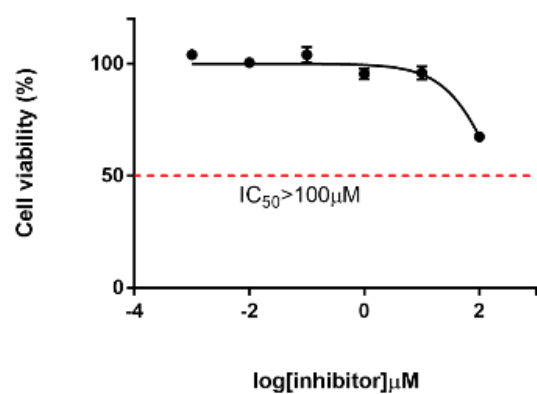

SK-BR-3 log curve of 4c

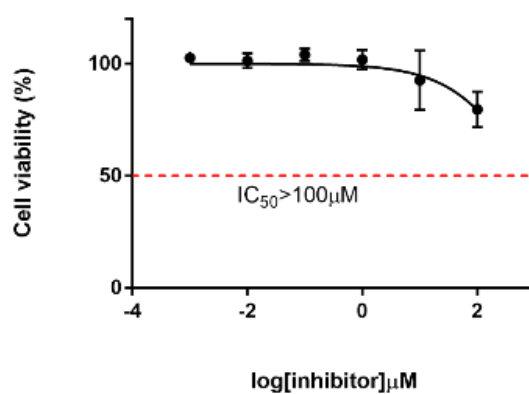

MCF-10A log curve of 4c

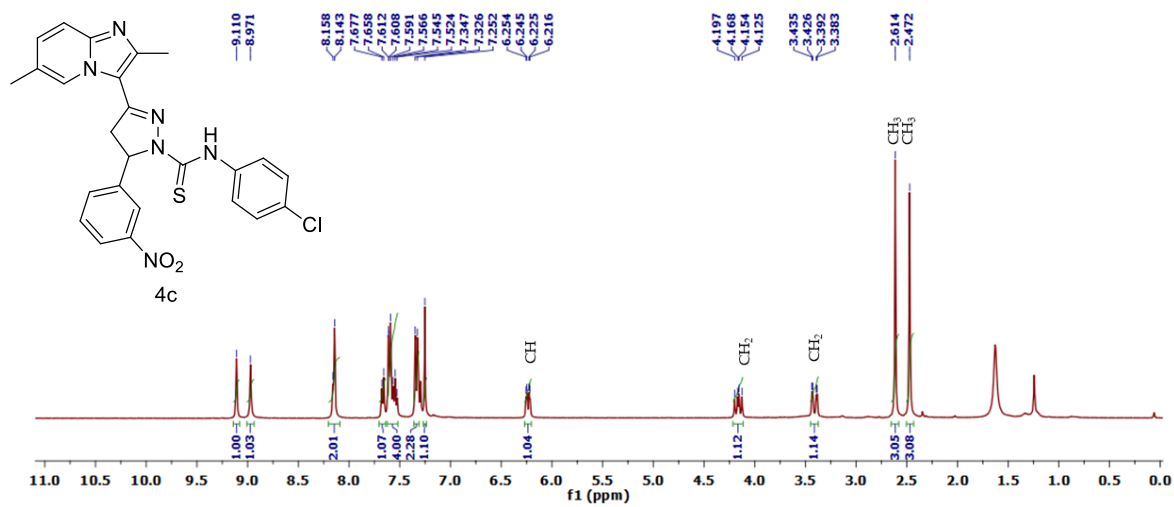

$^1\text{H}$  NMR of 4d

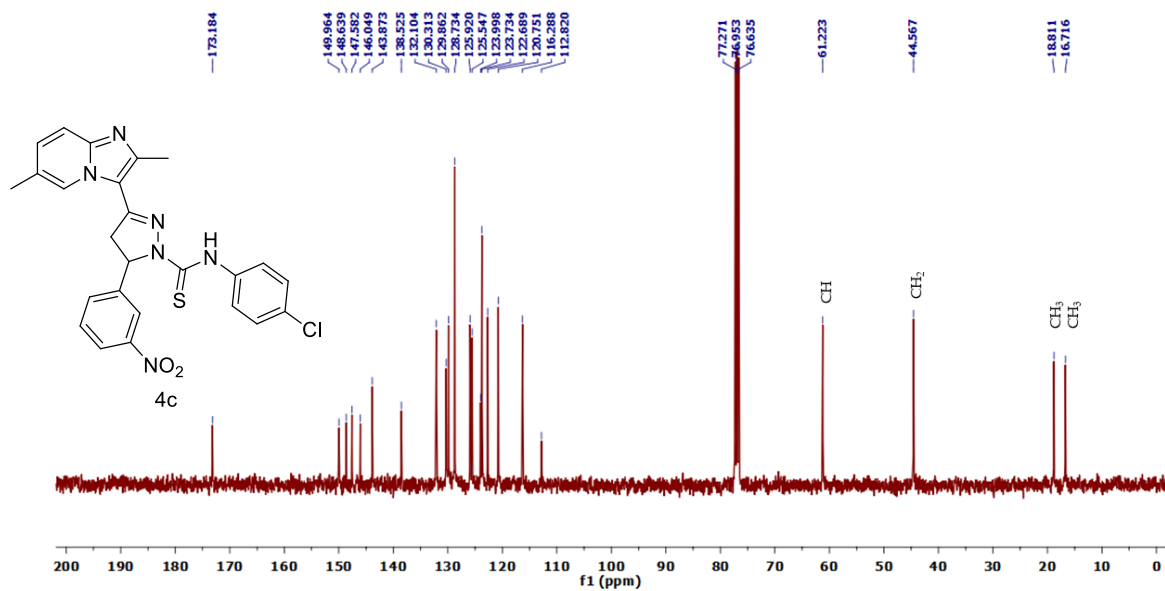

$^{13}\text{C}$  NMR of 4d

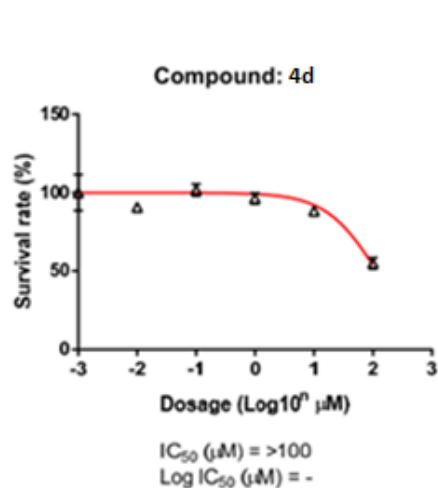

> Cell line: MCF7 (2000 cells/per well<sup>TM</sup>)  
 > Treated time: 72hrs  
 > Assay: MTT (90mins incubated)  
 > Data: 4d

| Conc. (μM) | Viability |       |
|------------|-----------|-------|
|            | AVE.      | ± SD. |
| 0          | 100.00    | 8.15  |
| 0.01       | 90.64     | 0.94  |
| 0.1        | 101.68    | 3.79  |
| 1          | 96.32     | 3.43  |
| 10         | 88.34     | 1.94  |
| 100        | 54.96     | 3.56  |

MCF-7 Log curve of 4d

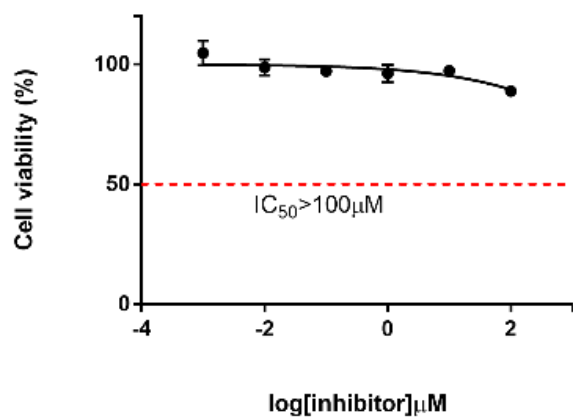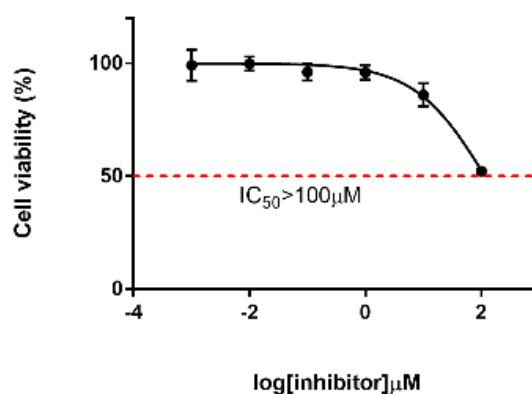

T47D Log curve of 4d

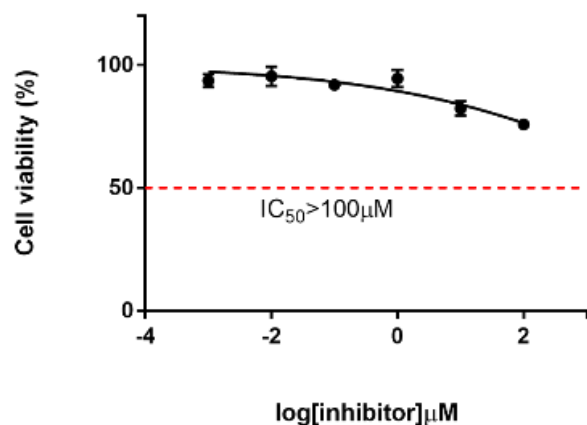

BT474 Log curve of 4d

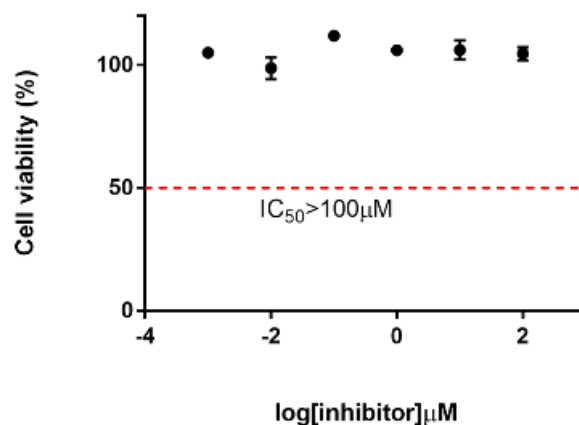

SK-BR-3 log curve of 4d

MCF-10A log curve of 4d

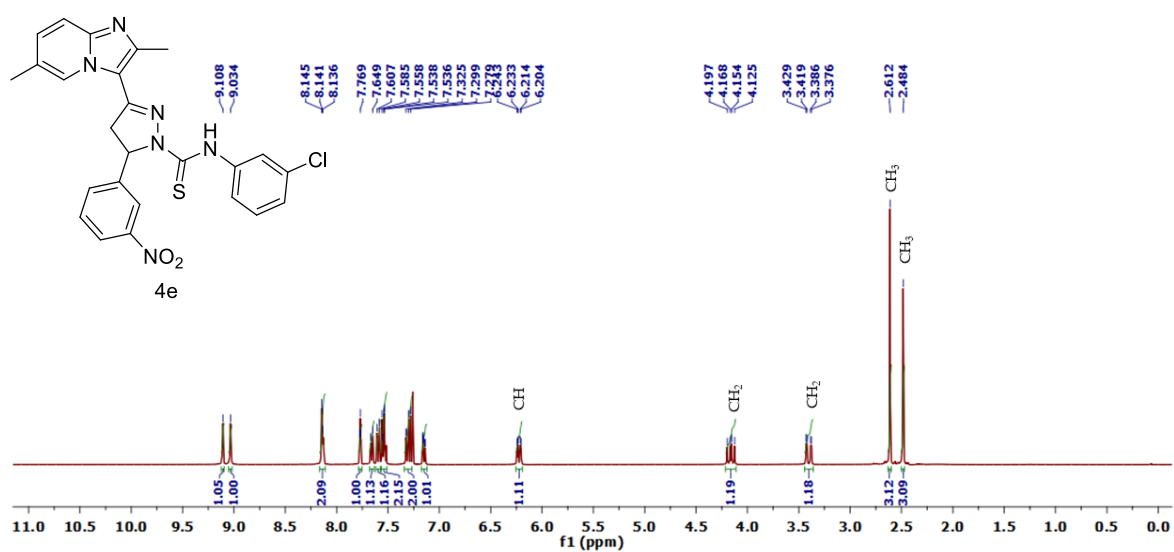

$^1\text{H}$  NMR of 4e

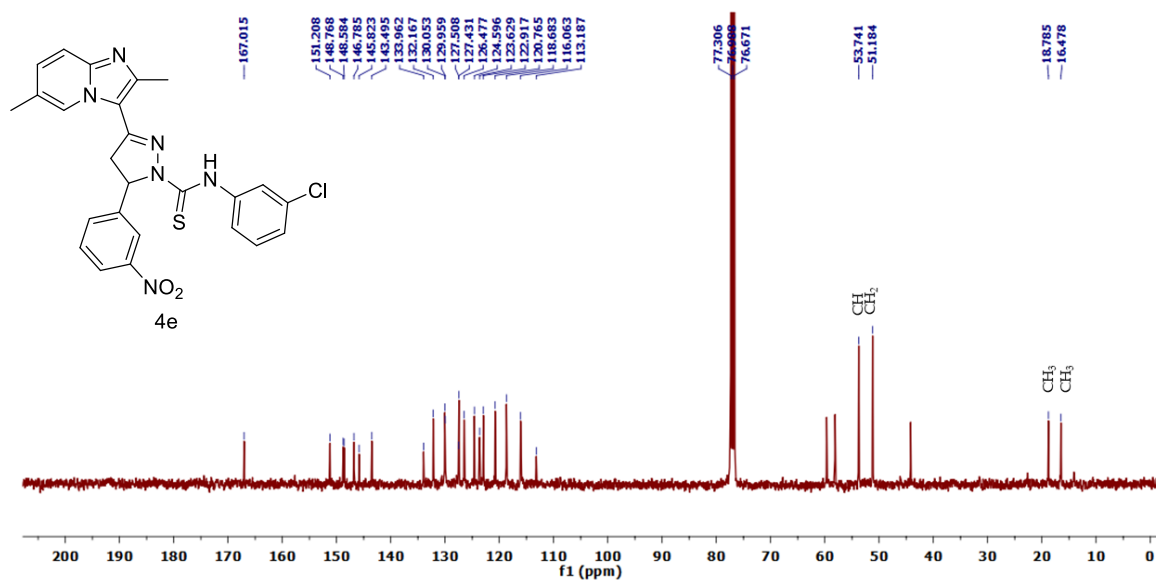

$^{13}\text{C}$  NMR of 4e

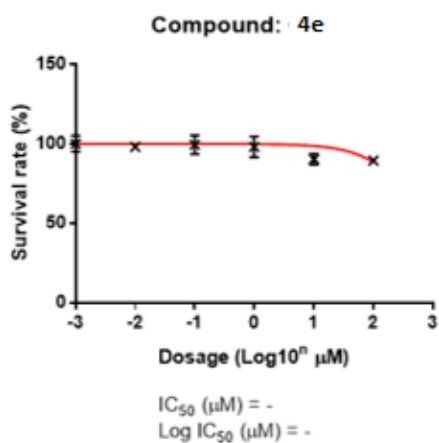

> Cell line: MCF7 (2000 cells/per well<sup>89</sup>)  
 > Treated time: 72hrs  
 > Assay: alamarBlue (4hrs incubated)  
 > Data: 4e

| Conc. ( $\mu\text{M}$ ) | Viability |           |
|-------------------------|-----------|-----------|
|                         | AVE.      | $\pm$ SD. |
| 0                       | 100.00    | 5.15      |
| 0.01                    | 98.04     | 0.80      |
| 0.1                     | 99.43     | 5.84      |
| 1                       | 98.11     | 6.52      |
| 10                      | 90.29     | 3.55      |
| 100                     | 89.47     | 2.21      |

MCF-7 Log curve of 4e

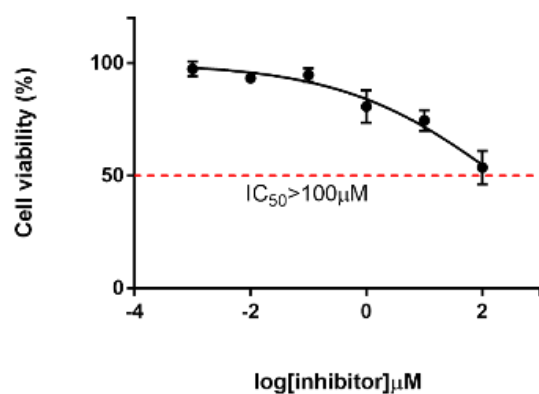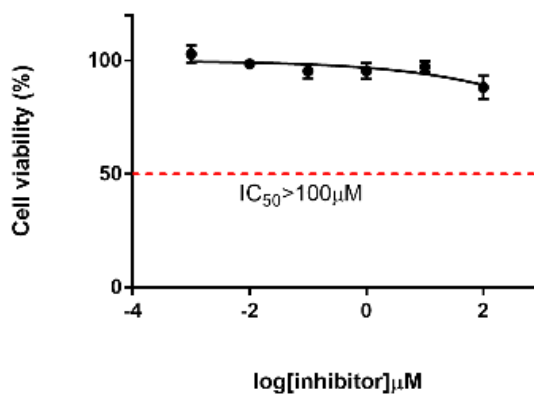

T47D Log curve of 4e

BT474 Log curve of 4e

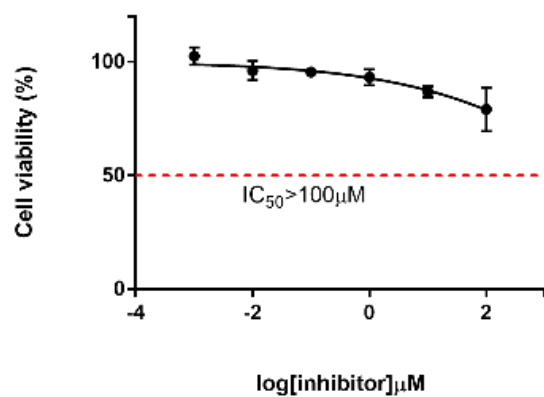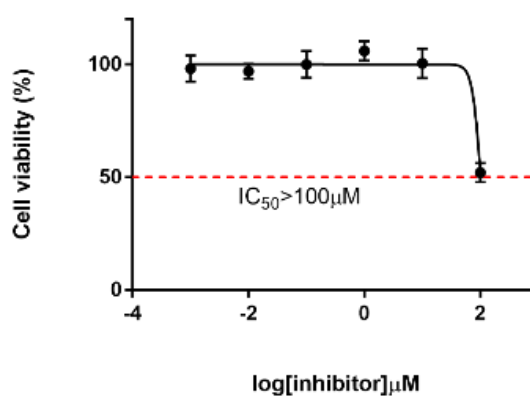

SK-BR-3 log curve of 4e

MCF-10A log curve of 4e

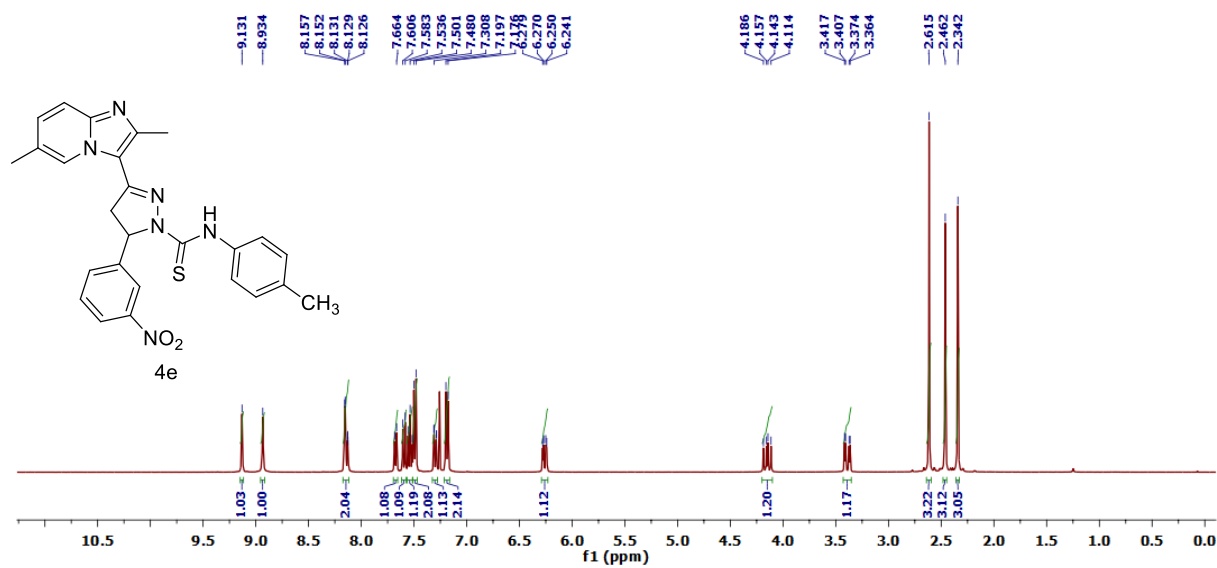

<sup>1</sup>H NMR of 4f

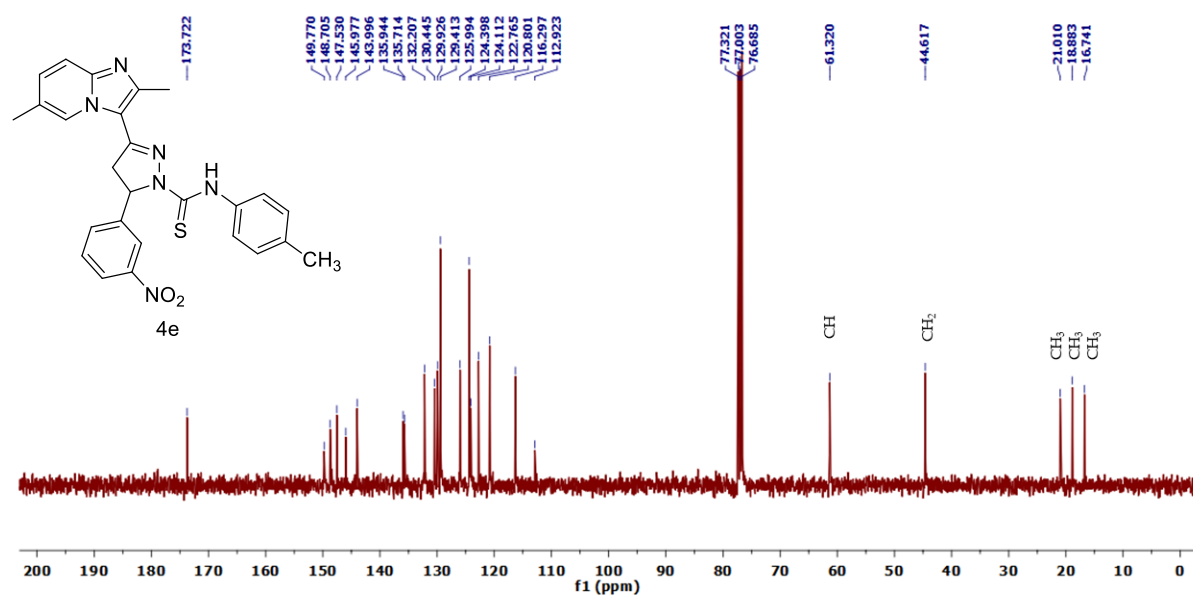

<sup>13</sup>C NMR of 4f

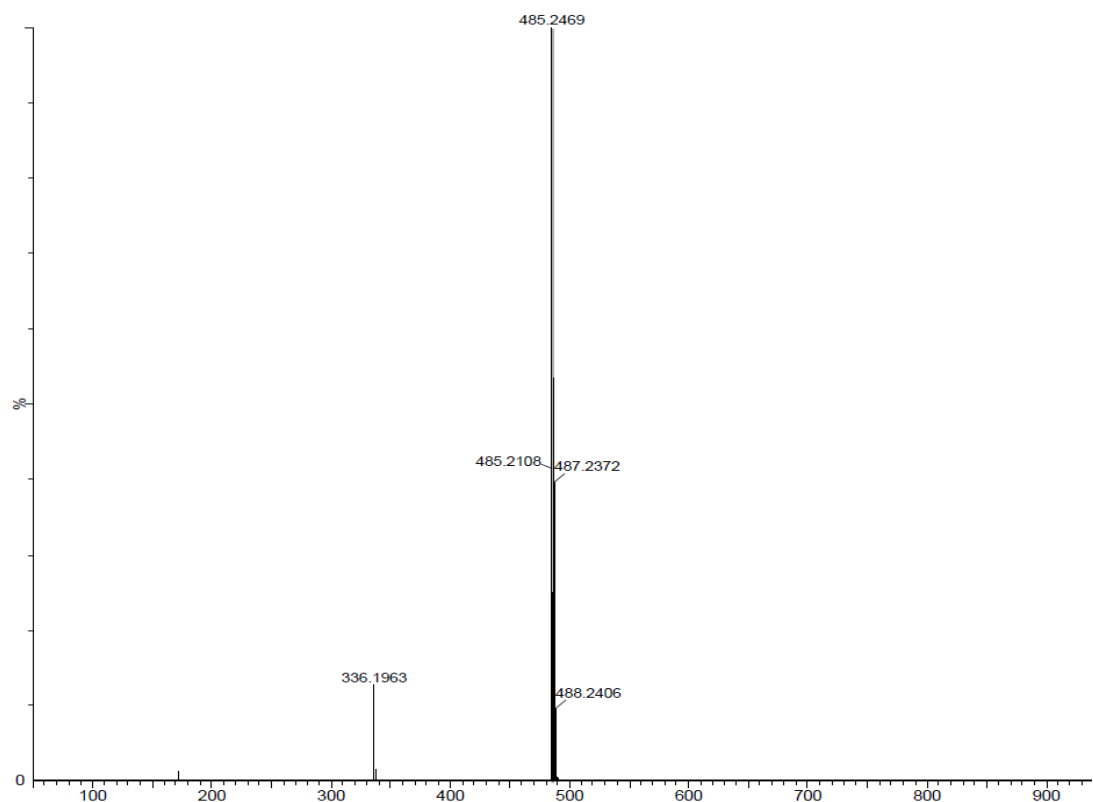

Mass spectra of 4f

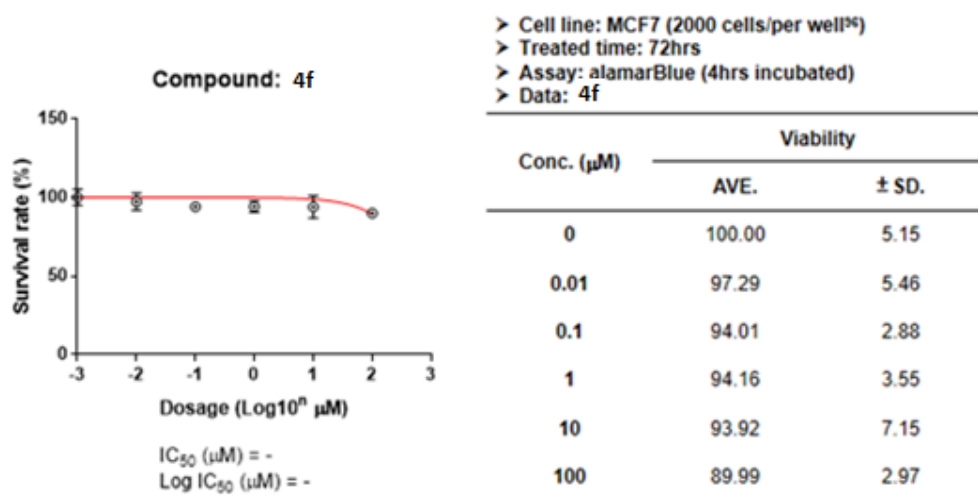

MCF-7 Log curve of 4f

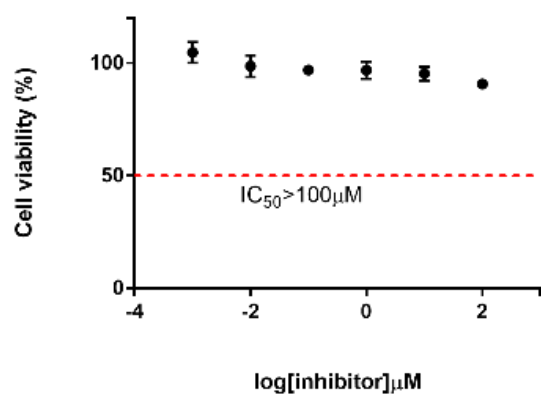

T47D Log curve of 4f

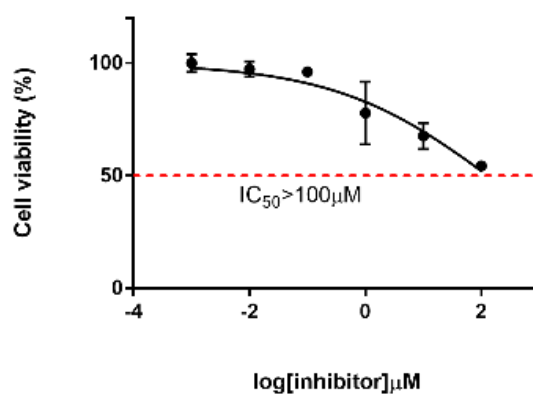

BT474 Log curve of 4f

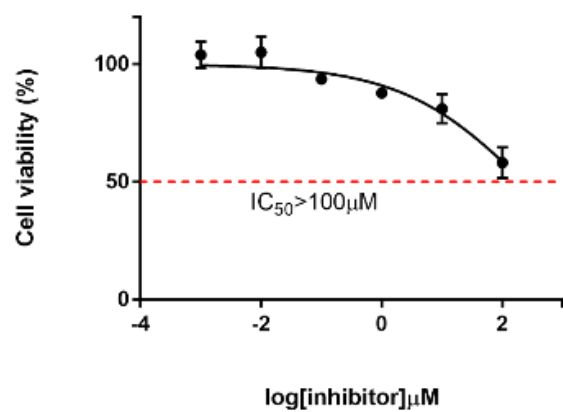

SK-BR-3 log curve of 4f

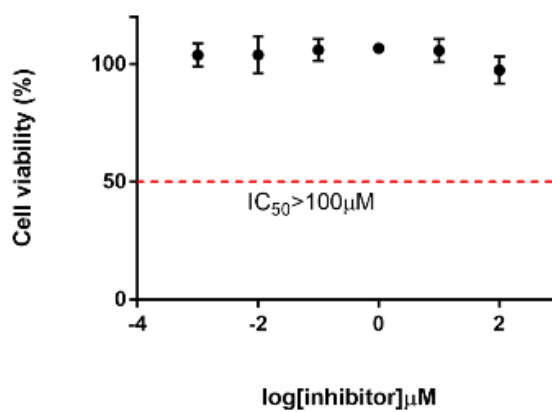

MCF-10A log curve of 4f

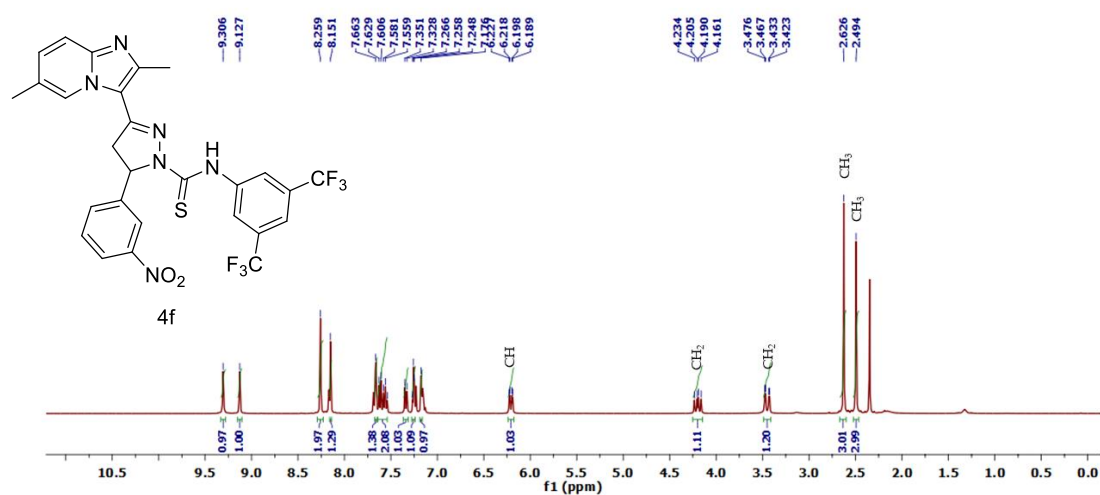

$^1H$  NMR of 4g



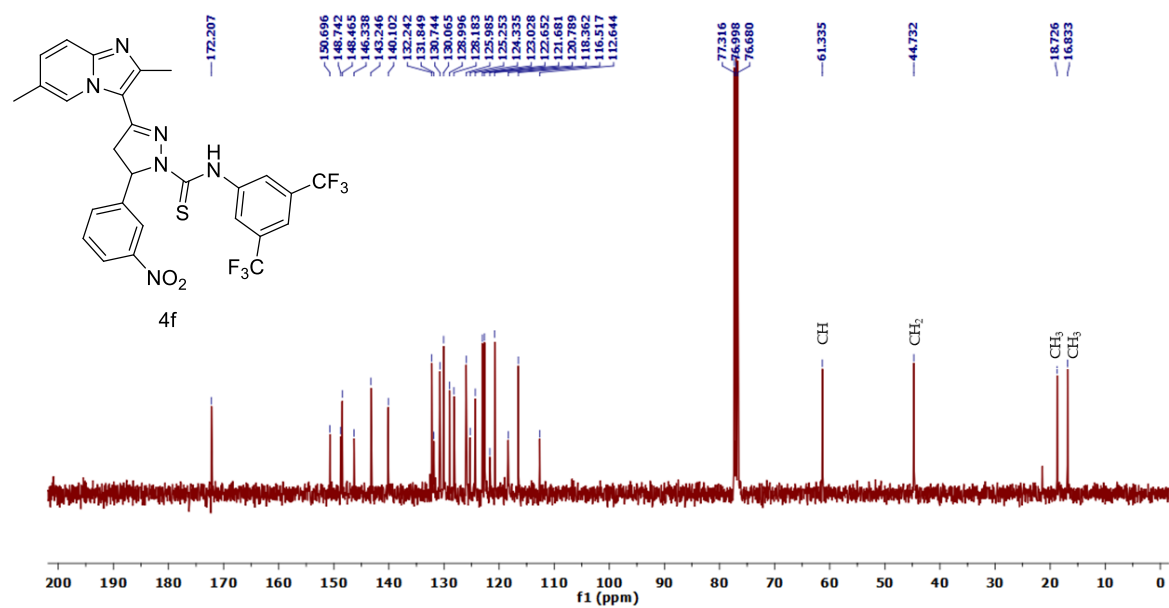

<sup>13</sup>C NMR of **4g**

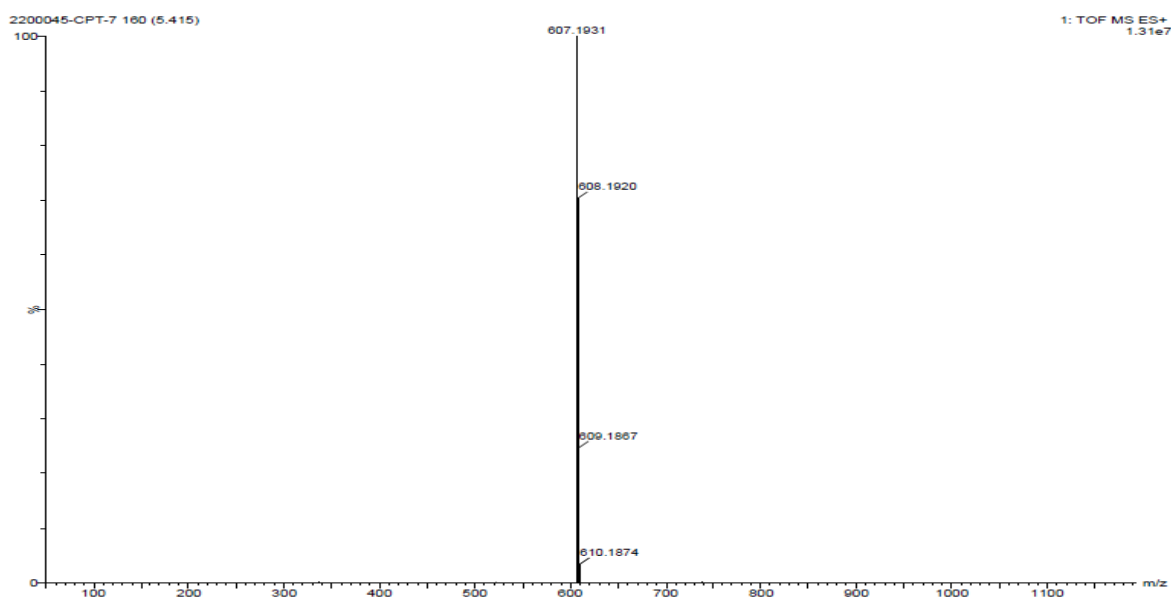

Mass spectra of compound **4g**

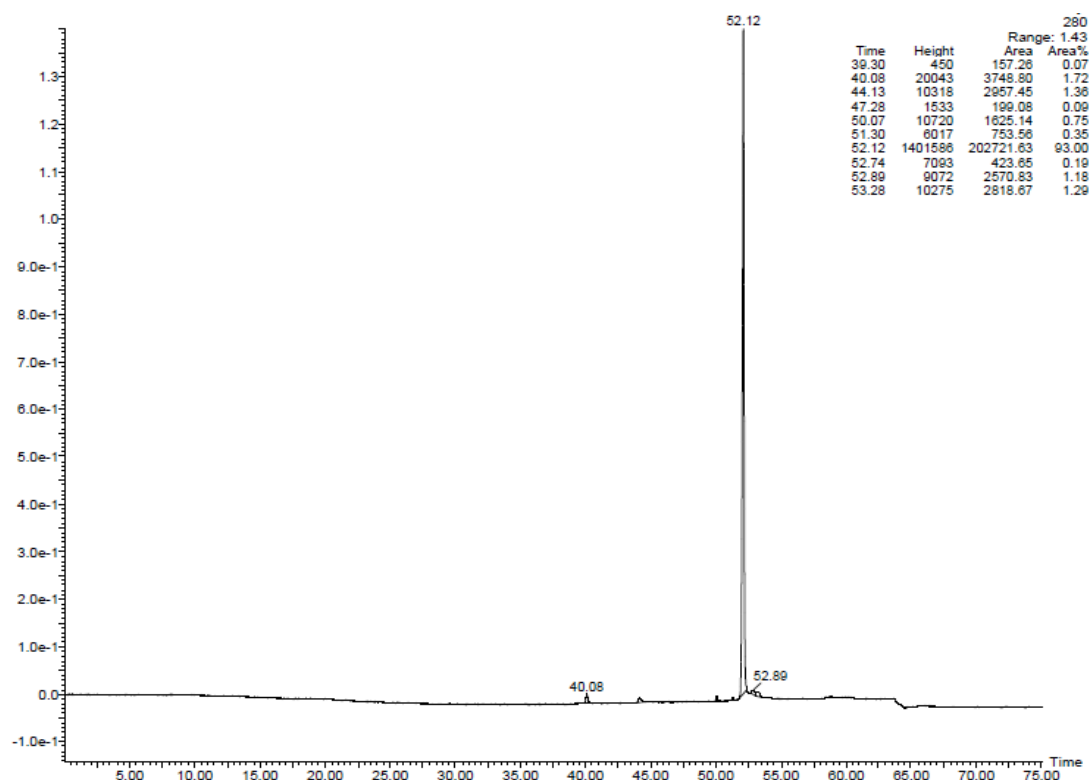

### HPLC of 4g

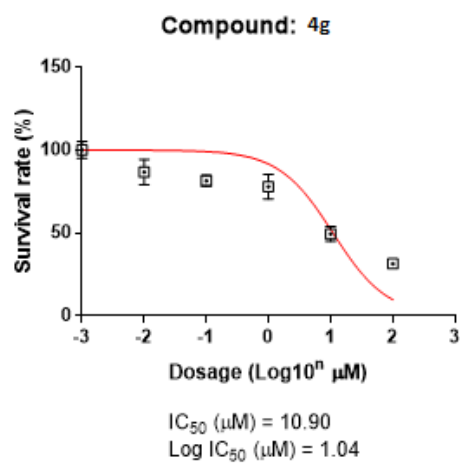

- > Cell line: MCF7 (2000 cells/per well<sup>96</sup>)
- > Treated time: 72hrs
- > Assay: alamarBlue (4hrs incubated)
- > Data: 4g

| Conc. (μM) | Viability |       |
|------------|-----------|-------|
|            | AVE.      | ± SD. |
| 0          | 100.00    | 5.15  |
| 0.01       | 86.63     | 7.66  |
| 0.1        | 81.43     | 3.26  |
| 1          | 77.91     | 7.47  |
| 10         | 49.40     | 4.47  |
| 100        | 31.40     | 1.95  |

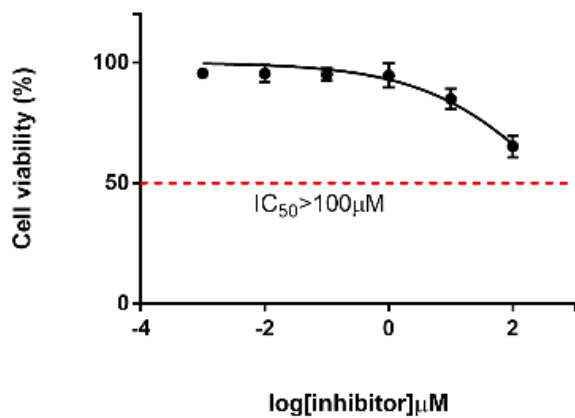

T47D Log curve of 4g

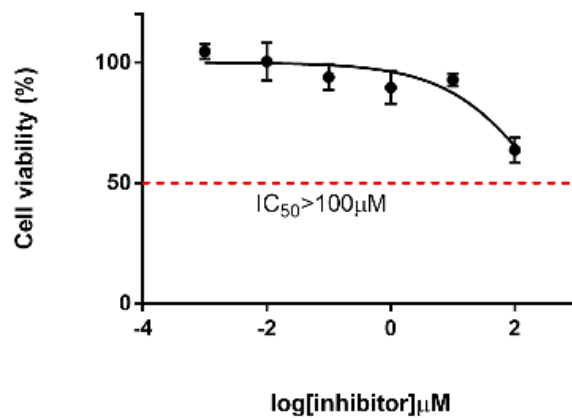

BT474 Log curve of 4g

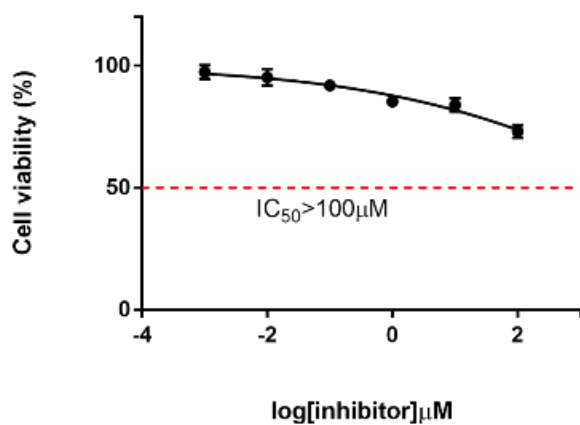

SK-BR-3 log curve of 4g

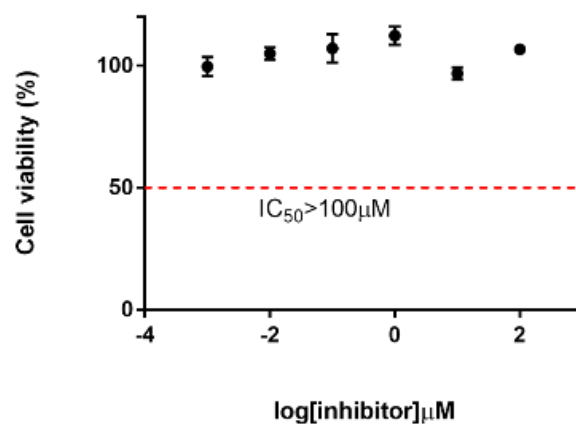

MCF-10A log curve of 4g

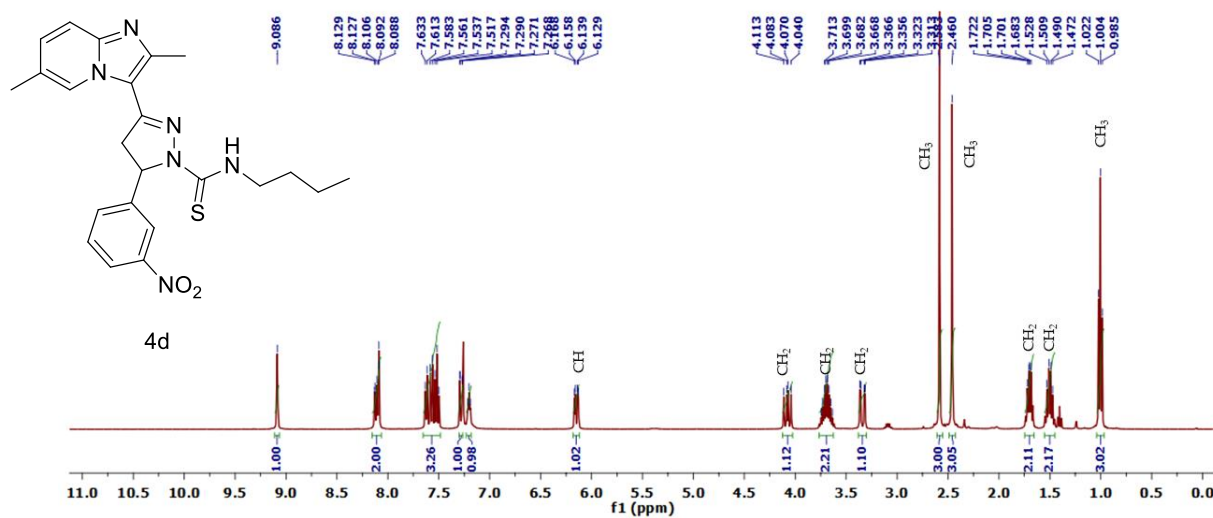

$^1\text{H}$  NMR of **4h**

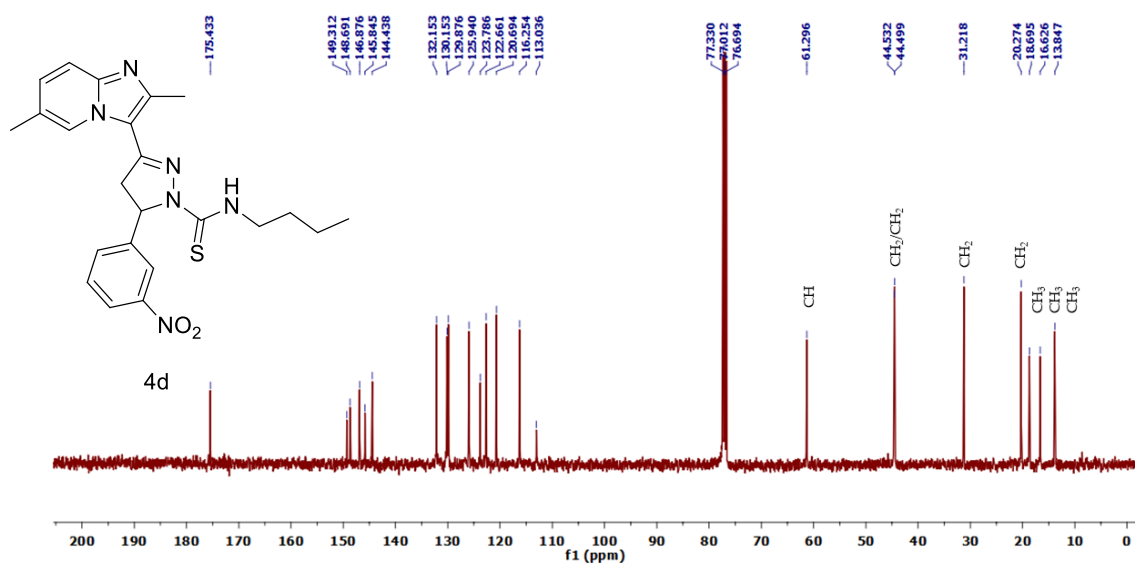

$^{13}\text{C}$  NMR of **4h**

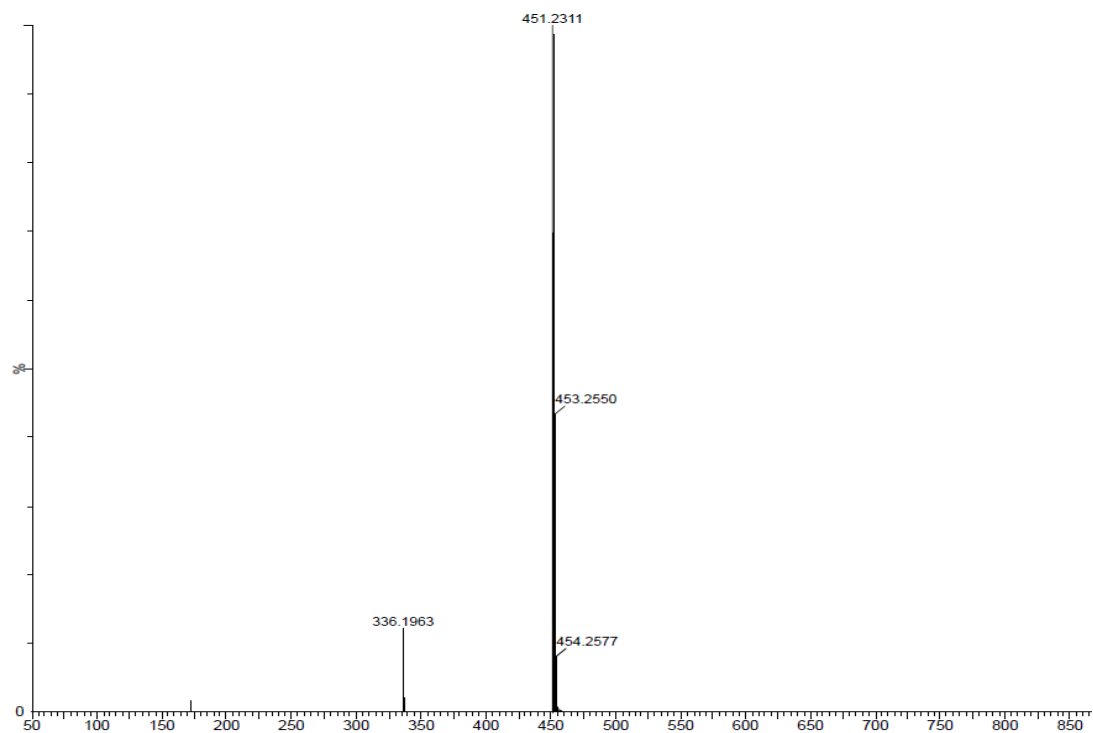

Mass spectra of **4h**

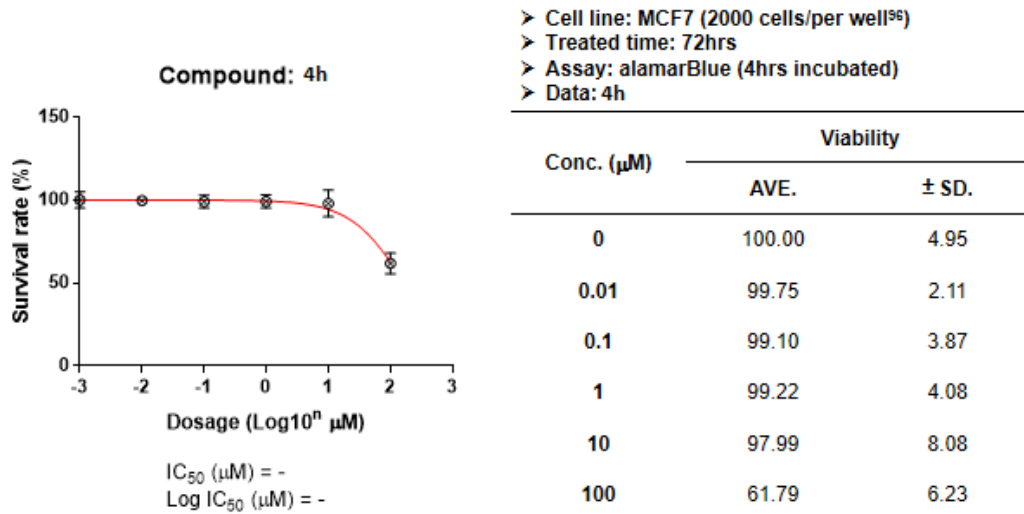

MCF-7 Log curve of **4h**

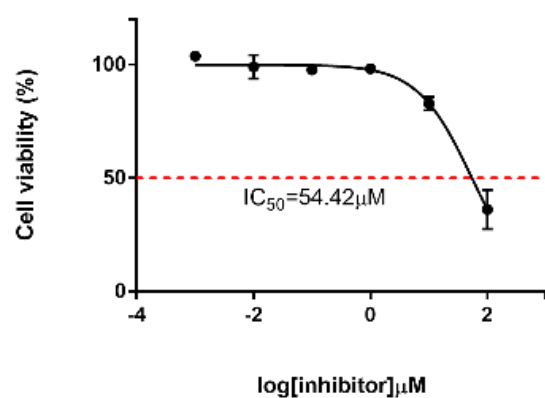

T47D Log curve of 4h

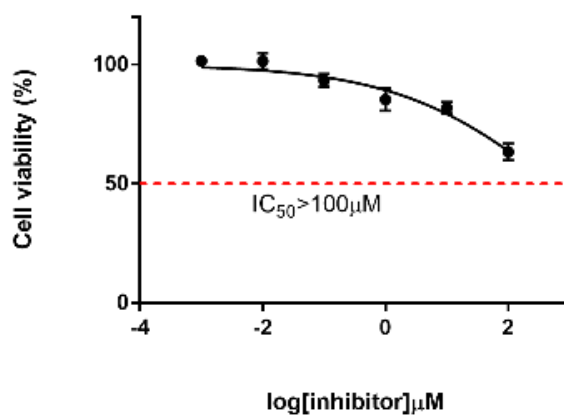

BT474 Log curve of 4h

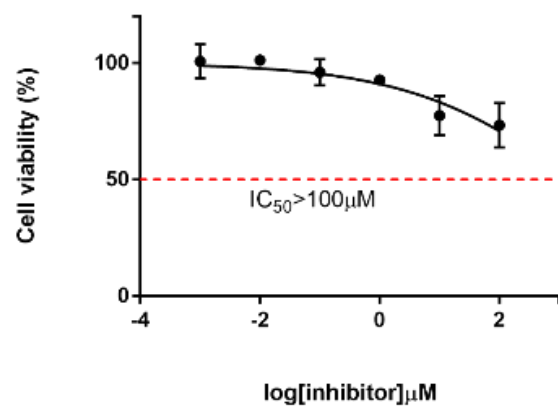

SK-BR-3 log curve of 4h

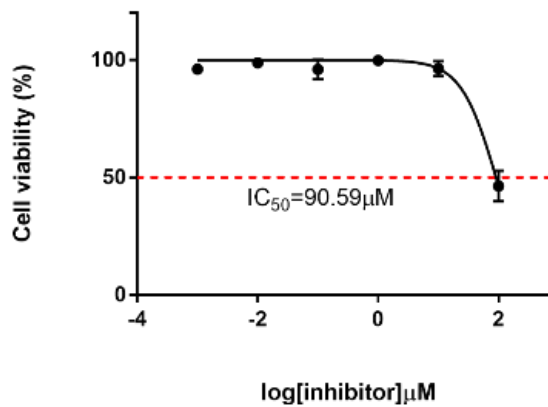

MCF-10A log curve of 4h
